# Supplementary material for: RETRACTED ARTICLE: New Acetamidine Cu(II) Schiff base complex supported on magnetic nanoparticles pectin for the synthesis of triazoles using click chemistry
Source: PubMed Central journal article supplement (PMC8904776; doi:10.1038/s41598-022-07674-7), 2022-03-08
Supplement: 41598_2022_7674_MOESM1_ESM.pdf [file 41598_2022_7674_MOESM1_ESM.pdf]

## Supporting Information

# New Acetamidine Cu (II) Schiff base complex supported on magnetic nanoparticles pectin for the Synthesis of Triazoles Using Click chemistry

Hossein Khashei Siuki, Pouya Ghamari Kargar, & Ghodsieh Bagherzade\*

\* Corresponding authors: E-mail: [gbagherzade@gmail.com](mailto:gbagherzade@gmail.com); [bagherzadeh@birjand.ac.ir](mailto:bagherzadeh@birjand.ac.ir). Fax: +98 56 32345192; Tel: +98 56 32345192

<sup>a</sup> Department of Chemistry, Faculty of Sciences, University of Birjand, Birjand, 97175-615, Iran.

### Spectra data

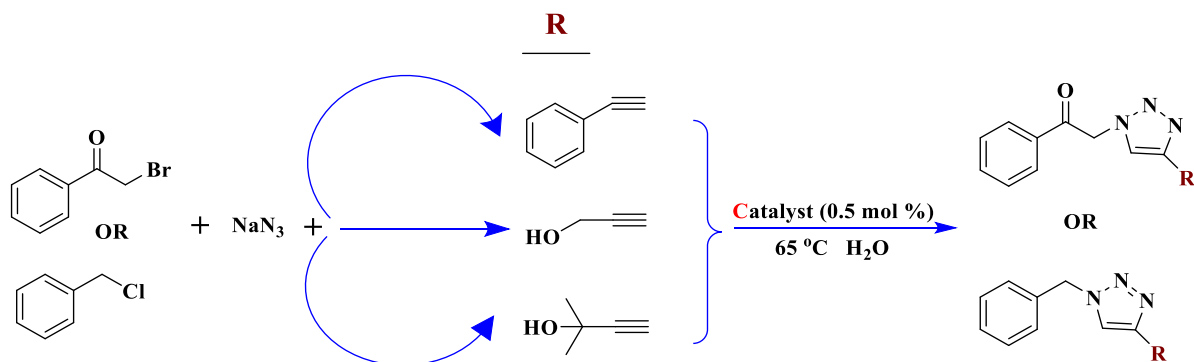

**Scheme 1:** Reaction of synthesis triazole derivatives in the presence of catalyst Fe<sub>3</sub>O<sub>4</sub>@Pectin@(CH<sub>2</sub>)<sub>3</sub>-Acetamide-Cu(II)

#### 1-benzyl-4-phenyl-1H-1,2,3-triazole (4a):

<sup>1</sup>HNMR (DMSO, 300 MHz): δ= 5.66 (s, 2H, CH<sub>2</sub>), 7.34-7.45(m, 8H, H-Ar), 7.48 (s, 1H, CH of triazole), 7.85-7.87 (d, 2H, H-Ar) ppm.

<sup>13</sup>CNMR (DMSO, 75 MHz): δ= 53.51, 122.03, 125.65, 128.37, 129.59, 133.22, 147.14 ppm.

Anal. calcd for C<sub>13</sub>H<sub>15</sub>N<sub>3</sub>: C, 75.57; H, 5.57; N, 17.86; found: C, 75.52; H, 5.58; N, 18.9. Mp (°C): 127-129. [71]

#### 1-(4-methylbenzyl)-4-phenyl-1H-1,2,3-triazole (4b):

<sup>1</sup>HNMR (DMSO, 300 MHz): δ= 2.308 (s, 3H, CH<sub>3</sub>), 5.607 (s, 2H, CH<sub>2</sub>), 7.25(q, 3H, H-Ar), 7.36 (t, 2H, H-Ar), 7.45 (t, 2H, h-Ar), 7.69 (s, 1H, CH of triazole), 7.86 (d, 2H, H-Ar) ppm.

<sup>13</sup>CNMR (DMSO, 75 MHz): δ= 21.18, 53.30, 128.42, 129.36, 129.80, 131.16, 133.48, 137.98, 147.09 ppm.

Anal. calcd for C<sub>16</sub>H<sub>15</sub>N<sub>3</sub>: C, 77.08; H, 6.06; N, 16.85; found: C, 77.11; H, 6.04; N, 16.85. M.p (°C): 103-105. [72]

**1-(4-chlorobenzyl)-4-phenyl-1H-1,2,3-triazole (4c):**

<sup>1</sup>HNMR (DMSO, 300 MHz): δ= 5.76 (s, 2H, CH<sub>2</sub>), 7.24 (d, 2H, H-Ar), 7.34 (d, 2H, H-Ar), 7.62 (q, 3H, H-Ar), 7.77 (s, 1H, CH of triazole), 7.86 (d, 2H, H-Ar) ppm.

Anal. calcd for C<sub>15</sub>H<sub>12</sub>ClN<sub>3</sub>: C, 66.79; H, 4.48; Cl, 13.14; N, 15.58; found: C, 66.59; H, 4.72; N, 15.54.

M.p (°C): 145-147 [73]

**1-(2-chlorobenzyl)-4-phenyl-1H-1,2,3-triazole (4d):**

<sup>1</sup>HNMR (DMSO, 300 MHz): δ= 5.77 (s, 2H, CH<sub>2</sub>), 7.34 (3H, H-Ar), 7.45 (3H, H-Ar), 7.57 (d, 1H, H-Ar), 7.67 (s, 1H, CH of triazole), 7.86 (d, 2H, H-Ar) ppm.

<sup>13</sup>CNMR (DMSO, 75 MHz): δ= 51.27, 125.68, 127.24, 128.28, 129.38, 130.76, 130.99, 133.66, 138.79, 146.94 ppm.

Anal. calcd for C<sub>15</sub>H<sub>12</sub>ClN<sub>3</sub>: C, 66.79; H, 4.48; Cl, 13.14; N, 15.58; found: C, 66.61; H, 4.53; N, 15.561.

Mp (°C): 88-90. [73]

**2-(1-benzyl-1H-1,2,3-triazol-4-yl)propan-2-ol (4e):**

<sup>1</sup>HNMR (DMSO, 300 MHz): δ= 1.45 (s, 6H, CH<sub>3</sub>), 5.09 (s, 2H, CH<sub>2</sub>), 5.55 (s, 1H, OH), 7.40 (5H, H-Ar), 7.91 (s, 1H, CH of triazole) ppm.

Anal. calcd for C<sub>12</sub>H<sub>15</sub>N<sub>3</sub>O: C, 66.34; H, 6.96; N, 19.34; O, 7.36; found: C, 66.41; H, 7.01; N, 19.41. Mp

(°C): 75-77. [72]

**2-(1-(4-methylbenzyl)-1H-1,2,3-triazol-4-yl)propan-2-ol (4f):**

<sup>1</sup>HNMR (DMSO, 300 MHz): δ= 1.44 (s, 6H, CH<sub>3</sub>), 2.30 (s, 3H, CH<sub>3</sub>), 5.09 (s, 2H, CH<sub>2</sub>), 5.49 (s, 1H, OH), 7.23 (5H, H-Ar), 7.87 (s, 1H, CH of triazole) ppm.

<sup>13</sup>CNMR (DMSO, 75 MHz): δ= 22.90, 31.94, 58.86, 78.40, 122.41, 125.68, 129.38, 131.04, 133.66, 134.80 ppm.

Anal. calcd for C<sub>13</sub>H<sub>17</sub>N<sub>3</sub>O: C, 67.51; H, 7.41; N, 18.17; O, 6.92; found: C, 67.53; H, 7.50; N, 17.98.

**2-(1-(4-chlorobenzyl)-1H-1,2,3-triazol-4-yl)propan-2-ol (4g):**

<sup>1</sup>HNMR (DMSO, 300 MHz): δ= 1.46 (s, 6H, CH<sub>3</sub>), 5.13 (s, 2H, CH<sub>2</sub>), 5.67 (s, 1H, OH), 7.42 (4H, H-Ar), 7.88 (s, 1H, CH of triazole) ppm.

<sup>13</sup>CNMR (DMSO, 75 MHz): δ= 31.17, 58.64, 78.40, 122.41, 129.38, 130.99, 132.19, 133.66 ppm.

Anal. calcd for C<sub>12</sub>H<sub>14</sub>ClN<sub>3</sub>O: C, 57.26; H, 5.61; Cl, 14.08; N, 16.69; O, 6.36; found: C, 57.31; H, 5.62; N, 16.82.

**2-(1-(2-chlorobenzyl)-1H-1,2,3-triazol-4-yl)propan-2-ol (4h):**

<sup>1</sup>HNMR (DMSO, 300 MHz): δ= 1.46 (s, 6H, CH<sub>3</sub>), 5.15 (s, 2H, CH<sub>2</sub>), 5.66 (s, 1H, OH), 7.27 (d, 1H, H-Ar), 7.51 (d of d, 1H, H-Ar), 7.63 (d of d, 1H, H-Ar), 7.73 (d, 1H, H-Ar), 7.90 (s, 1H, CH of triazole) ppm.

<sup>13</sup>CNMR (DMSO, 75 MHz): δ= 31.17, 52.89, 78.40, 121.05, 127.24, 127.25, 128.28, 130.76, 131.04, 133.66, 139.41 ppm.

Anal. calcd for C<sub>12</sub>H<sub>14</sub>ClN<sub>3</sub>O: C, 57.26; H, 5.61; Cl, 14.08; N, 16.69; O, 6.36; found: C, 57.34; H, 5.59; N, 16.79.

**1-Phenyl-2-(4-phenyl-1H-1,2,3-triazol-1-yl)ethanone (4i):**

<sup>1</sup>HNMR (DMSO, 300 MHz): δ= 6.29 (s, 2H, CH<sub>2</sub>), 7.35–7.40 (t, 1H, H-Ar), 7.46–7.68 (m, 4H, H-Ar), 7.75–7.81 (t, 1H, H-Ar), 7.88–7.92 (d, 2H, H-Ar), 8.11–8.15 (d, 2H, H-Ar), 8.55 (s, 1H, CH of triazole) ppm.

<sup>13</sup>CNMR (DMSO, 75 MHz): δ= 56.49, 123.53, 125.64, 128.36, 128.72, 129.45, 129.51, 131.24, 134.61, 134.79, 146.78, 192.70 ppm. Mp (°C): 170-172 [71].

Anal. calcd for C<sub>16</sub>H<sub>13</sub>N<sub>3</sub>O: C, 72.99; H, 4.98; N, 15.96; found: C, 72.67; H, 5.01; N, 15.94. Mp (°C): 170-172 [71].

**1-(4-Bromophenyl)-2-(4-phenyl-1H-1,2,3-triazol-1-yl) ethanone (4j).**

<sup>1</sup>HNMR (DMSO, 300 MHz): δ= 6.27 (s, 2H, CH<sub>2</sub>), 7.35–7.52 (t,t, 3H, H -Ar), 7.85–7.91 (m, 4H, H-Ar), 8.03–8.07 (d, 2H, H-Ar), 8.33–8.37 (d, 2H, H-Ar), 8.54 (s, 1H, CH of triazole) ppm.

<sup>13</sup>CNMR (DMSO, 75 MHz): δ= 56.47, 121.53, 127.54, 128.06, 128.86, 129.82, 129.85, 130.51, 131.54, 133.61, 148.78, 192.70 ppm. Mp (°C): 116-120 [71].

Anal. calcd for C<sub>16</sub>H<sub>12</sub>BrN<sub>3</sub>O: C, 56.16; H, 3.53; N, 12.28; found: C, 56.24; H, 3.55; N, 12.14. Mp (°C): 116-120 [71].

**1-(4-Nitro phenyl)-2-(4-phenyl-1H-1,2,3-triazol-1-yl)ethanone (4k):**

<sup>1</sup>HNMR (DMSO, 300 MHz): δ= 6.37 (s, 2H, CH<sub>2</sub>), 7.35–7.41 (t, 1H, H-Ar), 7.47–7.52 (t, 2H, H-Ar), 7.89–7.92 (t, 2H, H-Ar), 8.33–8.37 (d, 2H, H-Ar), 8.44–8.48 (d, 2H, H-Ar), 8.55 (s, 1H, CH of triazole) ppm.

<sup>13</sup>CNMR (DMSO, 75 MHz): δ= 56.47, 121.23, 123.54, 128.06, 128.76, 129.72, 129.80, 130.41, 140.58, 148.88, 150.51, 192.71 ppm.

Anal. calcd for C<sub>16</sub>H<sub>12</sub>N<sub>4</sub>O<sub>3</sub>: C, 62.33; H, 3.92; N, 18.17; found: C, 61.94; H, 3.62; N, 18.21. Mp (°C): 184-185. [74]

**2-(4-(2-Hydroxypropan-2-yl)-1H-1,2,3-triazol-1-yl)-1- phenylethanone (4l).**

<sup>1</sup>HNMR (DMSO, 300 MHz): δ= 1.51 (s, 2×3H, CH<sub>3</sub>), 5.16 (s, 1H, OH), 6.15 (s, 2H, CH<sub>2</sub>), 7.61–7.66 (t, 2H, H-Ar), 7.73–7.79 (t, 2H, CH-Ar), 7.86 (s, 1H, CH of triazole), 8.08–8.11 (d,d, 2H, H-Ar) ppm.

<sup>13</sup>CNMR (DMSO, 75 MHz): δ= 31.30, 56.46, 78.32, 122.92, 128.75, 130.78, 133.14, 133.53, 134.53, 190.90 ppm.

Anal. calcd for C<sub>11</sub>H<sub>11</sub>N<sub>3</sub>O<sub>2</sub>: C, 60.82; H, 5.10; N, 19.34; found: C, 60.79; H, 5.13; N, 19.37. Mp (°C): 96–98. [74]

**1-(4-Bromophenyl)-2-(4-(2-hydroxypropan-2-yl)-1H-1,2,3- triazol-1-yl)ethanone (4m).**

<sup>1</sup>HNMR (DMSO, 300 MHz): δ= 1.51 (s, 6H, CH<sub>3</sub>), 5.16 (s, 1H, OH), 6.13 (s, 1H, CH<sub>2</sub>), 7.84–7.87 (d, 3H, CH of triazole and H-Ar), 8.00–8.03 (d, 2H, H-Ar) ppm.

<sup>13</sup>CNMR (DMSO, 75 MHz): δ= 31.29, 56.50, 78.29, 122.52, 127.32, 128.75, 129.88, 131.54, 133.53, 152.58, 190.91 ppm. Mp (°C): 167–169 [75].

Anal. calcd for C<sub>13</sub>H<sub>14</sub>N<sub>4</sub>O<sub>4</sub>: C, 53.79; H, 4.86; N, 19.30; found: C, 53.63; H, 4.80; N, 19.39.

**2-(4-(2-Hydroxypropan-2-yl)-1H-1,2,3-triazol-1-yl)-1-(4-nitrophenyl)ethanone (4n).**

<sup>1</sup>HNMR (DMSO, 300 MHz): δ= 1.38 (s, 6H, CH<sub>3</sub>), 4.90 (s, 2H, CH<sub>2</sub>), 5.53 (s, 1H, OH), 7.75 (s, 1H, CH of triazole), 8.31–8.33 (d,d, 2H, H-Ar), 8.41–8.44 (d, 2H, j ¼ 8.7, H-Ar) ppm.

<sup>13</sup>CNMR (DMSO, 75 MHz): δ= 31.18, 56.49, 78.29, 122.82, 123.83, 129.75, 131.24, 140.58, 152.58, 190.90 ppm.

Anal. calcd for C<sub>13</sub>H<sub>14</sub>N<sub>4</sub>O<sub>4</sub>: C, 53.79, H, 4.86; N, 19.30; found: C, 53.63; H, 4.80; N, 19.39. Mp (°C): 126–128 [74].

**2-(4-(Hydroxymethyl)-1H-1,2,3-triazol-1-yl)-1-phenylethanone (4o).**

<sup>1</sup>HNMR (DMSO, 300 MHz): δ= 4.58–4.59 (d, 2H, CH<sub>2</sub>–OH), 5.23–5.27 (t, 1H, OH), 6.18 (s, 2H, CH<sub>2</sub>), 7.60–7.66 (t, 2H, H-Ar), 7.73–7.79 (t, 1H, H-Ar), 7.95 (s, 1H, CH of triazole), 8.08–8.11 (d, 2H, H-Ar) ppm.

<sup>13</sup>CNMR (DMSO, 75 MHz): δ= 55.57, 56.20, 124.87, 128.64, 129.47, 134.67, 148.41, 192.76 ppm.

Anal. calcd for C<sub>11</sub>H<sub>11</sub>N<sub>3</sub>O<sub>2</sub>: C, 60.82; H, 5.10; N, 19.34; found: C, 60.79; H, 5.13; N, 19.37. Mp (°C): 111–113 [75].

**1-(4-Bromophenyl)-2-(4-(hydroxymethyl)-1H-1,2,3-triazol-1-yl)ethanone (4p).**

<sup>1</sup>HNMR (DMSO, 300 MHz): δ= 4.38 (s, 2H, CH<sub>2</sub>), 5.00 (s, 2H, CH<sub>2</sub>–OH), 5.75 (s, 1H, OH), 7.98 (s, 1H, CH of triazole), 8.33–8.37 (d, 2H, H-Ar), 8.44–8.48 (d, 2H, H-Ar) ppm.

<sup>13</sup>CNMR (DMSO, 75 MHz): δ= 55.57, 56.20, 122.77, 127.72, 129.47, 131.41, 134.67, 147.41, 192.76 ppm.

Anal. calcd for C<sub>11</sub>H<sub>10</sub>BrN<sub>3</sub>O<sub>2</sub>: C, 44.62; H, 3.40; Br, 26.98; N, 14.19; found: C, 44.48; H, 3.44; N, 14.21. Mp (°C): 156–158 [74].

## Green chemistry metrics analysis

The following formulae were used for calculating atom economy (AE), atom efficiency (AEf), carbon efficiency (CE), reaction mass efficiency (RME), optimum efficiency (OE), process mass intensity (PMI), E factor, solvent and water intensity (SI and WI).

$$AE = \frac{\text{Molecular weight of the product}}{\text{Total molecular weight of reactants}}$$

$$AE_f = AE \cdot \text{Yield (\%)}$$

$$CE = \frac{\text{Amount of carbon in the product}}{\text{Total carbon present in reactants}}$$

$$RME = \frac{\text{Mass of isolated product}}{\text{Total mass of reactants}} \times 100$$

$$OE = \frac{RME}{AE} \times 100$$

$$PMI = \frac{\text{Total mass of input material in the whole process}}{\text{Mass of product}}$$

$$E \text{ factor} = PMI - 1$$

$$SI = \frac{\text{Total mass of solvents excluding water in the whole process}}{\text{Mass of product}}$$

$$WI = \frac{\text{Total mass of water used in the whole process}}{\text{Mass of product}}$$

## Synthesis of 1-benzyl-4-phenyl-1H-1,2,3-triazole catalyzed by Fe<sub>3</sub>O<sub>4</sub>@Pectin@(CH<sub>2</sub>)<sub>3</sub>-Acetamide-Cu(II) (Table 2, entry 1)

### Experimental procedure:

Benzyl chloride (1.0 mmol), Sodium azide (1.2 mmol), phenylacetylene (1.0mmol), catalyst (0.5 mol %) in the presence of water solvent (2ml). The reaction mixture was heated at 65 °C and stirred until TLC monitoring indicated no further progress in the reaction. Then, the reaction mixture was cooled to room temperature. After completion of the reaction, the catalyst was removed by a magnet. A pure product was obtained by recrystallization from EtOAc-water.

### Materials used for metrics calculations:

Benzyl chloride (0.126 g, 1.0 mmol), Sodium azide (0.078 g, 1.2 mmol), phenylacetylene (0.102 g, 1.0mmol), H<sub>2</sub>O (1.994 g, 2ml), product (0.228 g, 0.97 mmol).

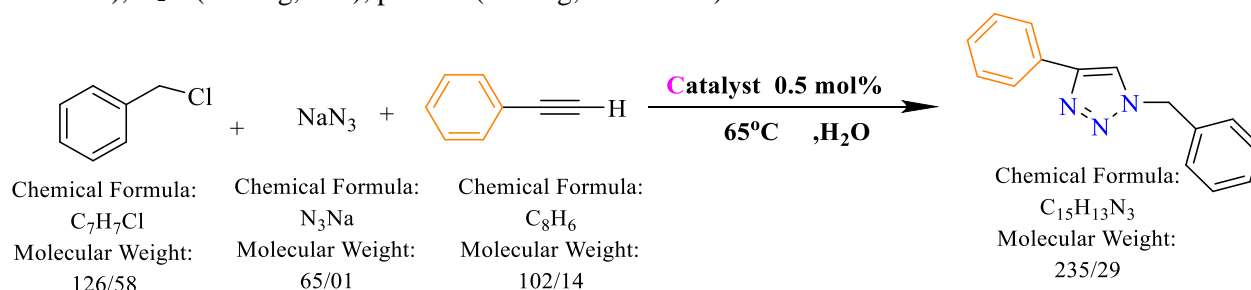

$$AE = \frac{235.29}{126.58 + 78.012 + 102.14} \times 100 = 76.70$$

$$AE_f = 76.70 \times 97\% = 74.39$$

$$CE = \frac{15 \times 0.00097}{7 \times 0.001 + 8 \times 0.001} \times 100 = 97$$

$$RME = \frac{0.228}{0.126 + 0.078 + 0.102} \times 100 = 76$$

$$OE = \frac{76}{76.70} \times 100 = 99.08$$

$$PMI = \frac{0.126 + 0.078 + 0.102 + 1.994}{0.228} = 10.08$$

$$E \text{ factor} = 10.08 - 1 = 9.08$$

$$SI = 0$$

$$WI = \frac{2 \times 0.997}{0.228} = 8.74$$

## Synthesis of 1-benzyl-4-phenyl-1H-1,2,3-triazole catalyzed by Cu/C (Table 3, entry 1)

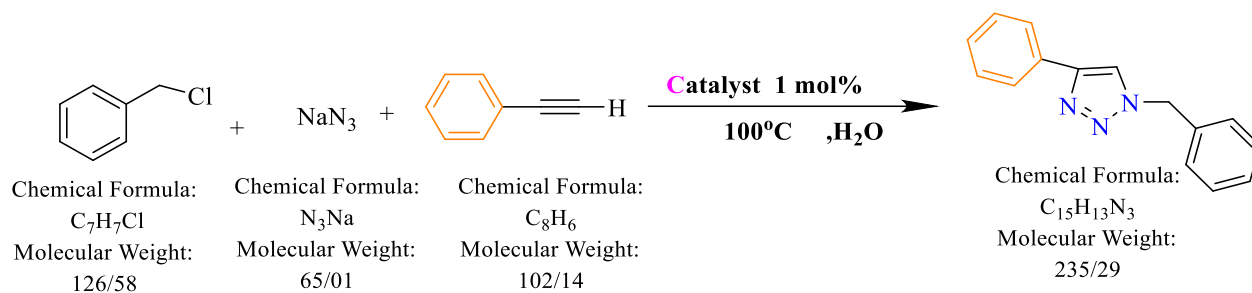

### Materials used for metrics calculations:

Benzyl chloride (0.126 g, 1.0 mmol), Sodium azide (0.071 g, 1.1 mmol), phenylacetylene (0.102 g, 1.0 mmol),  $H_2O$  (0.997 g, 1 ml), product (0.214 g, 0.91 mmol).

$$AE = \frac{235.29}{126.58 + 71.511 + 102.14} \times 100 = 78.37$$

$$AE_f = 78.37 \times 91\% = 71.31$$

$$CE = \frac{15 \times 0.00091}{7 \times 0.001 + 8 \times 0.001} \times 100 = 91$$

$$RME = \frac{0.214}{0.126 + 0.071 + 0.102} \times 100 = 71.57$$

$$OE = \frac{71.57}{78.37} \times 100 = 91.32$$

$$PMI = \frac{0.126 + 0.071 + 0.102 + 0.997}{0.214} = 6.05$$

$$E \text{ factor} = 6.05 - 1 = 5.05$$

$$SI = 0$$

$$WI = \frac{1 \times 0.997}{0.214} = 4.66$$

**Synthesis of 1-benzyl-4-phenyl-1H-1,2,3-triazole catalyzed by CuNPs/MagSilica (Table 3, entry 4)**

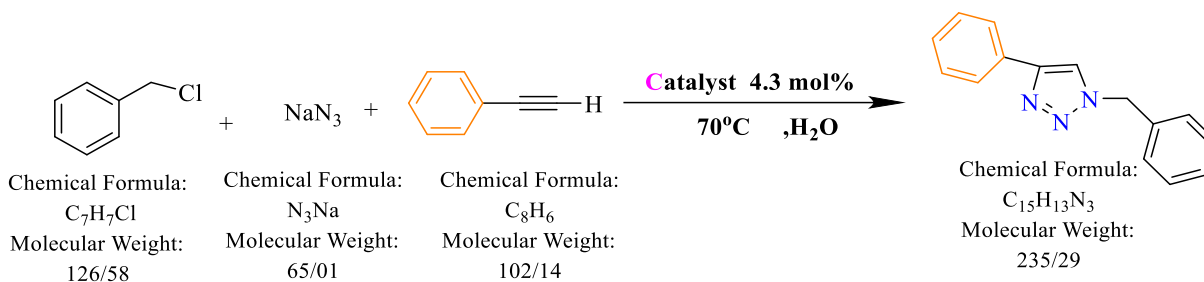

**Materials used for metrics calculations:**

Benzyl chloride (0.126 g, 1.0 mmol), Sodium azide (0.071 g, 1.1 mmol), phenylacetylene (0.102 g, 1.0mmol),  $H_2O$  (1.99 g, 2 ml), product (0.195 g, 0.83 mmol).

$$AE = \frac{235.29}{126.58+71.511+102.14} \times 100 = 78.37$$

$$AE_f = 78.37 \times 83\% = 65.04$$

$$CE = \frac{15 \times 0.00083}{7 \times 0.001 + 8 \times 0.001} \times 100 = 83$$

$$RME = \frac{0.195}{0.126+0.071+0.102} \times 100 = 65.21$$

$$OE = \frac{65.21}{78.37} \times 100 = 83.20$$

$$PMI = \frac{0.126+0.071+0.102+1.99}{0.195} = 11.73$$

$$E \text{ factor} = 11.73 - 1 = 10.73$$

$$SI = 0$$

$$WI = \frac{2 \times 0.997}{0.195} = 10.20$$



**Synthesis of 1-benzyl-4-phenyl-1H-1,2,3-triazole catalyzed by HCP-NHC–Cu (Table 3, entry 7)**

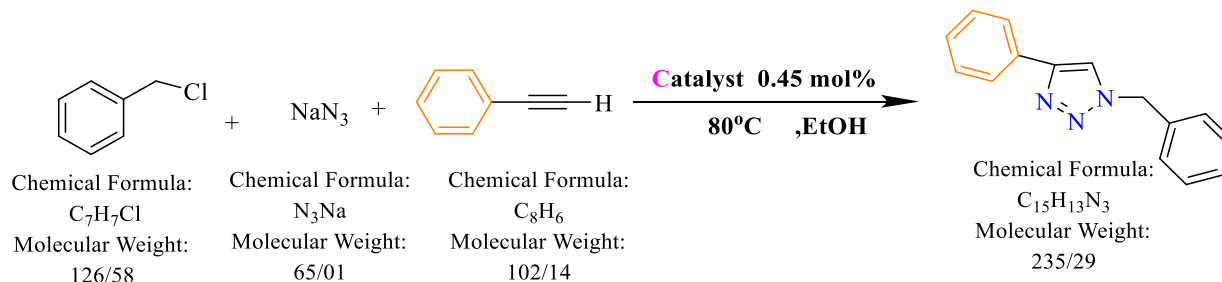

**Materials used for metrics calculations:**

Benzyl chloride (0.126 g, 1.0 mmol), Sodium azide (0.071 g, 1.1 mmol), phenylacetylene (0.102 g, 1.0mmol), EtOH (1.58 g, 2 ml), product (0.214 g, 0.91 mmol).

$$AE = \frac{235.29}{126.58+71.511+102.14} \times 100 = 78.37$$

$$AE_f = 78.37 \times 91\% = 71.31$$

$$CE = \frac{15 \times 0.00091}{7 \times 0.001 + 8 \times 0.001} \times 100 = 91$$

$$RME = \frac{0.214}{0.126+0.071+0.102} \times 100 = 71.57$$

$$OE = \frac{71.57}{78.37} \times 100 = 91.32$$

$$PMI = \frac{0.126+0.071+0.102+1.58}{0.214} = 8.78$$

$$E \text{ factor} = 8.78 - 1 = 7.78$$

$$SI = \frac{2 \times 0.789}{0.214} = 7.37$$

$$WI = 0$$

## Synthesis of 1-Phenyl-2-(4-phenyl-1H-1,2,3-triazol-1-yl)ethanone catalyzed by Fe<sub>3</sub>O<sub>4</sub>@Pectin@(CH<sub>2</sub>)<sub>3</sub>-Acetamide-Cu(II) (Table 2, entry 9)

### Experimental procedure:

Phenacyl bromide (1.0 mmol), Sodium azide (1.2 mmol), phenylacetylene (1.0mmol), catalyst (0.5 mol %) in the presence of water solvent (2ml). The reaction mixture was heated at 65 °C and stirred until TLC monitoring indicated no further progress in the reaction. Then, the reaction mixture was cooled to room temperature. After completion of the reaction, the catalyst was removed by a magnet. A pure product was obtained by recrystallization from EtOAc-water.

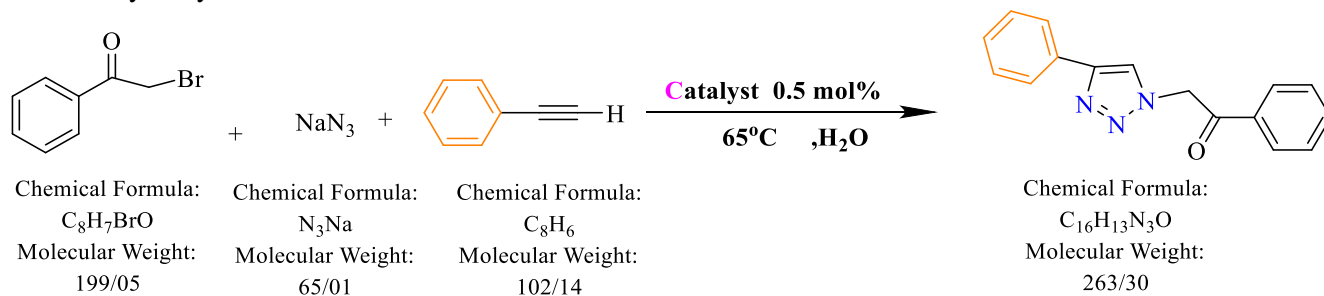

### Materials used for metrics calculations:

Phenacyl bromide (0.199 g, 1.0 mmol), Sodium azide (0.078 g, 1.2 mmol), phenylacetylene (0.102 g, 1.0mmol), H<sub>2</sub>O (1.994 g, 2ml), product (0.258 g, 0.98 mmol).

$$AE = \frac{263.30}{199.05+78.012+102.14} \times 100 = 69.43$$

$$AE_f = 69.43 \times 98\% = 68.04$$

$$CE = \frac{16 \times 0.00098}{8 \times 0.001 + 8 \times 0.001} \times 100 = 98$$

$$RME = \frac{0.258}{0.199+0.078+0.102} \times 100 = 68.07$$

$$OE = \frac{68.07}{69.43} \times 100 = 98.04$$

$$PMI = \frac{0.258}{0.199+0.078+0.102+1.994} = 9.19$$

$$E \text{ factor} = 9.19 - 1 = 8.19$$

$$SI = 0$$

$$WI = \frac{2 \times 0.997}{0.258} = 7.72$$

**Synthesis of 1-Phenyl-2-(4-phenyl-1H-1,2,3-triazol-1-yl)ethanone by CuFe<sub>2</sub>O<sub>4</sub> (Table 4, entry 2)**

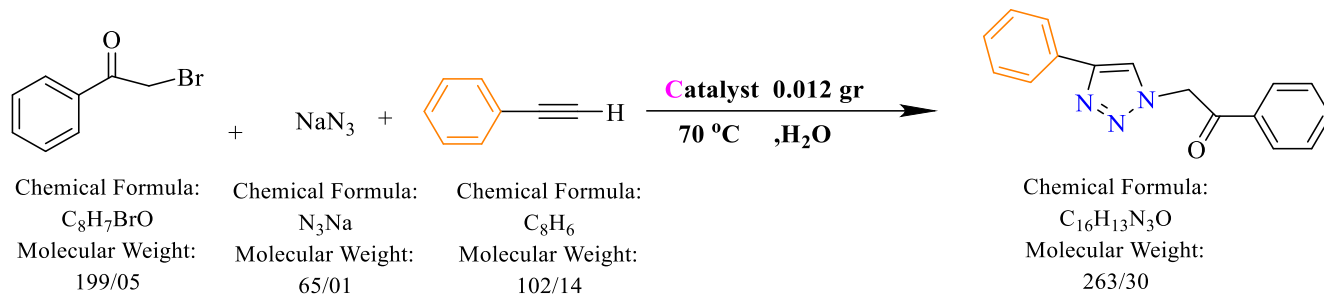

**Materials used for metrics calculations:**

Phenacyl bromide (0.199 g, 1.0 mmol), Sodium azide (0.071 g, 1.1 mmol), phenylacetylene (0.102 g, 1.0mmol), H<sub>2</sub>O (1.99 g, 2 ml), product (0.205 g, 0.78 mmol).

$$AE = \frac{263.30}{199.05+71+102.14} \times 100 = 70.74$$

$$AE_f = 70.74 \times 78\% = 55.17$$

$$CE = \frac{16 \times 0.00078}{8 \times 0.001 + 8 \times 0.001} \times 100 = 78$$

$$RME = \frac{0.205}{0.199+0.071+0.102} \times 100 = 55.10$$

$$OE = \frac{55.10}{70.74} \times 100 = 77.89$$

$$PMI = \frac{0.199+0.071+0.102+1.99}{0.205} = 11.52$$

$$E \text{ factor} = 11.52 - 1 = 10.52$$

$$SI = 0$$

$$WI = \frac{2 \times 0.997}{0.205} = 9.70$$

**Synthesis of 1-Phenyl-2-(4-phenyl-1H-1,2,3-triazol-1-yl)ethanone by PANs<sub>2</sub>FCu (Table 4, entry 3)**

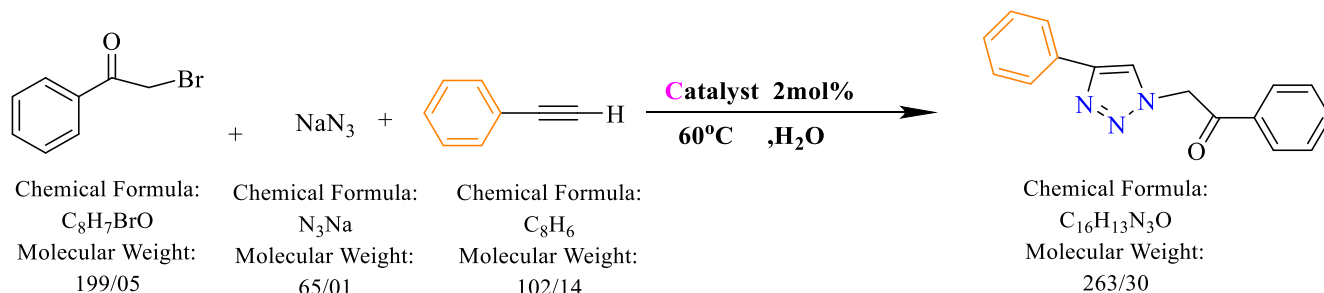

**Materials used for metrics calculations:**

Phenacyl bromide (0.199 g, 1.0 mmol), Sodium azide (0.078 g, 1.2 mmol), phenylacetylene (0.102 g, 1.0mmol), H<sub>2</sub>O (4.98 g, 5ml), product (0.239 g, 0.91 mmol).

$$AE = \frac{263.30}{199.05+78.012+102.14} \times 100 = 69.43$$

$$AE_f = 69.43 \times 91\% = 63.18$$

$$CE = \frac{16 \times 0.00091}{8 \times 0.001 + 8 \times 0.001} \times 100 = 91$$

$$RME = \frac{0.239}{0.199+0.078+0.102} \times 100 = 63.06$$

$$OE = \frac{63.06}{69.43} \times 100 = 90.82$$

$$PMI = \frac{0.199+0.078+0.102+4.98}{0.239} = 22.42$$

$$E \text{ factor} = 22.42 - 1 = 21.42$$

$$SI = 0$$

$$WI = \frac{5 \times 0.997}{0.239} = 20.85$$

**Synthesis of 1-Phenyl-2-(4-phenyl-1H-1,2,3-triazol-1-yl)ethanone by CuI-USY (Table 4, entry 7)**

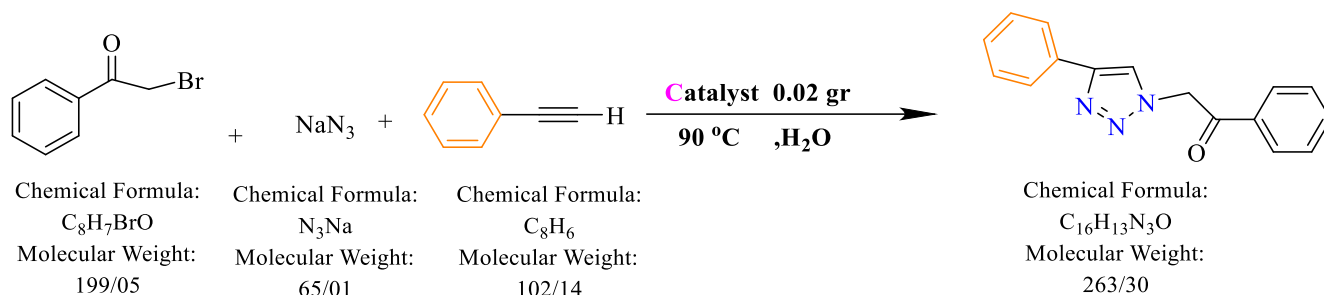

**Materials used for metrics calculations:**

Phenacyl bromide (0.199 g, 1.0 mmol), Sodium azide (0.071 g, 1.1 mmol), phenylacetylene (0.102 g, 1.0mmol),  $H_2O$  (1.99 g, 2 ml), product (0.163 g, 0.62 mmol).

$$AE = \frac{263.30}{199.05+71+102.14} \times 100 = 70.74$$

$$AE_f = 70.74 \times 62\% = 43.85$$

$$CE = \frac{16 \times 0.00062}{8 \times 0.001 + 8 \times 0.001} \times 100 = 62$$

$$RME = \frac{0.163}{0.199+0.071+0.102} \times 100 = 43.81$$

$$OE = \frac{43.81}{70.74} \times 100 = 61.93$$

$$PMI = \frac{0.199+0.071+0.102+1.99}{0.163} = 14.49$$

$$E \text{ factor} = 14.49 - 1 = 13.49$$

$$SI = 0$$

$$WI = \frac{2 \times 0.997}{0.163} = 12.20$$

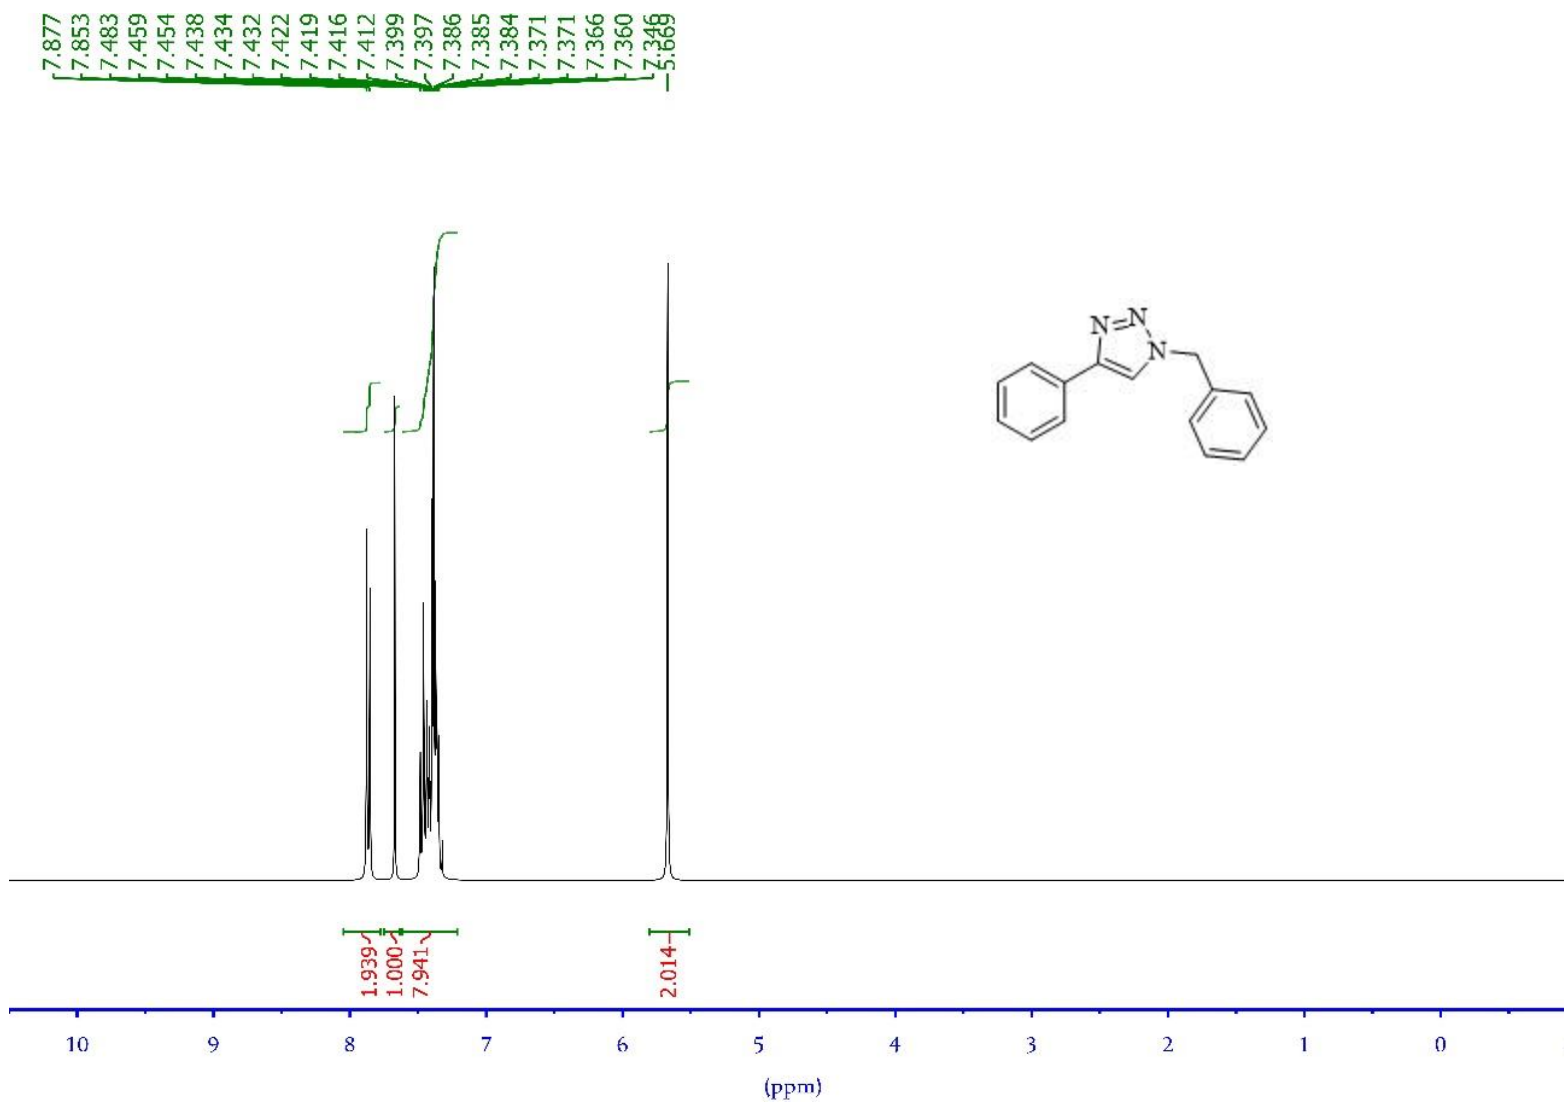

Figure S1: <sup>1</sup>H-NMR of 1-benzyl-4-phenyl-1H-1,2,3-triazole

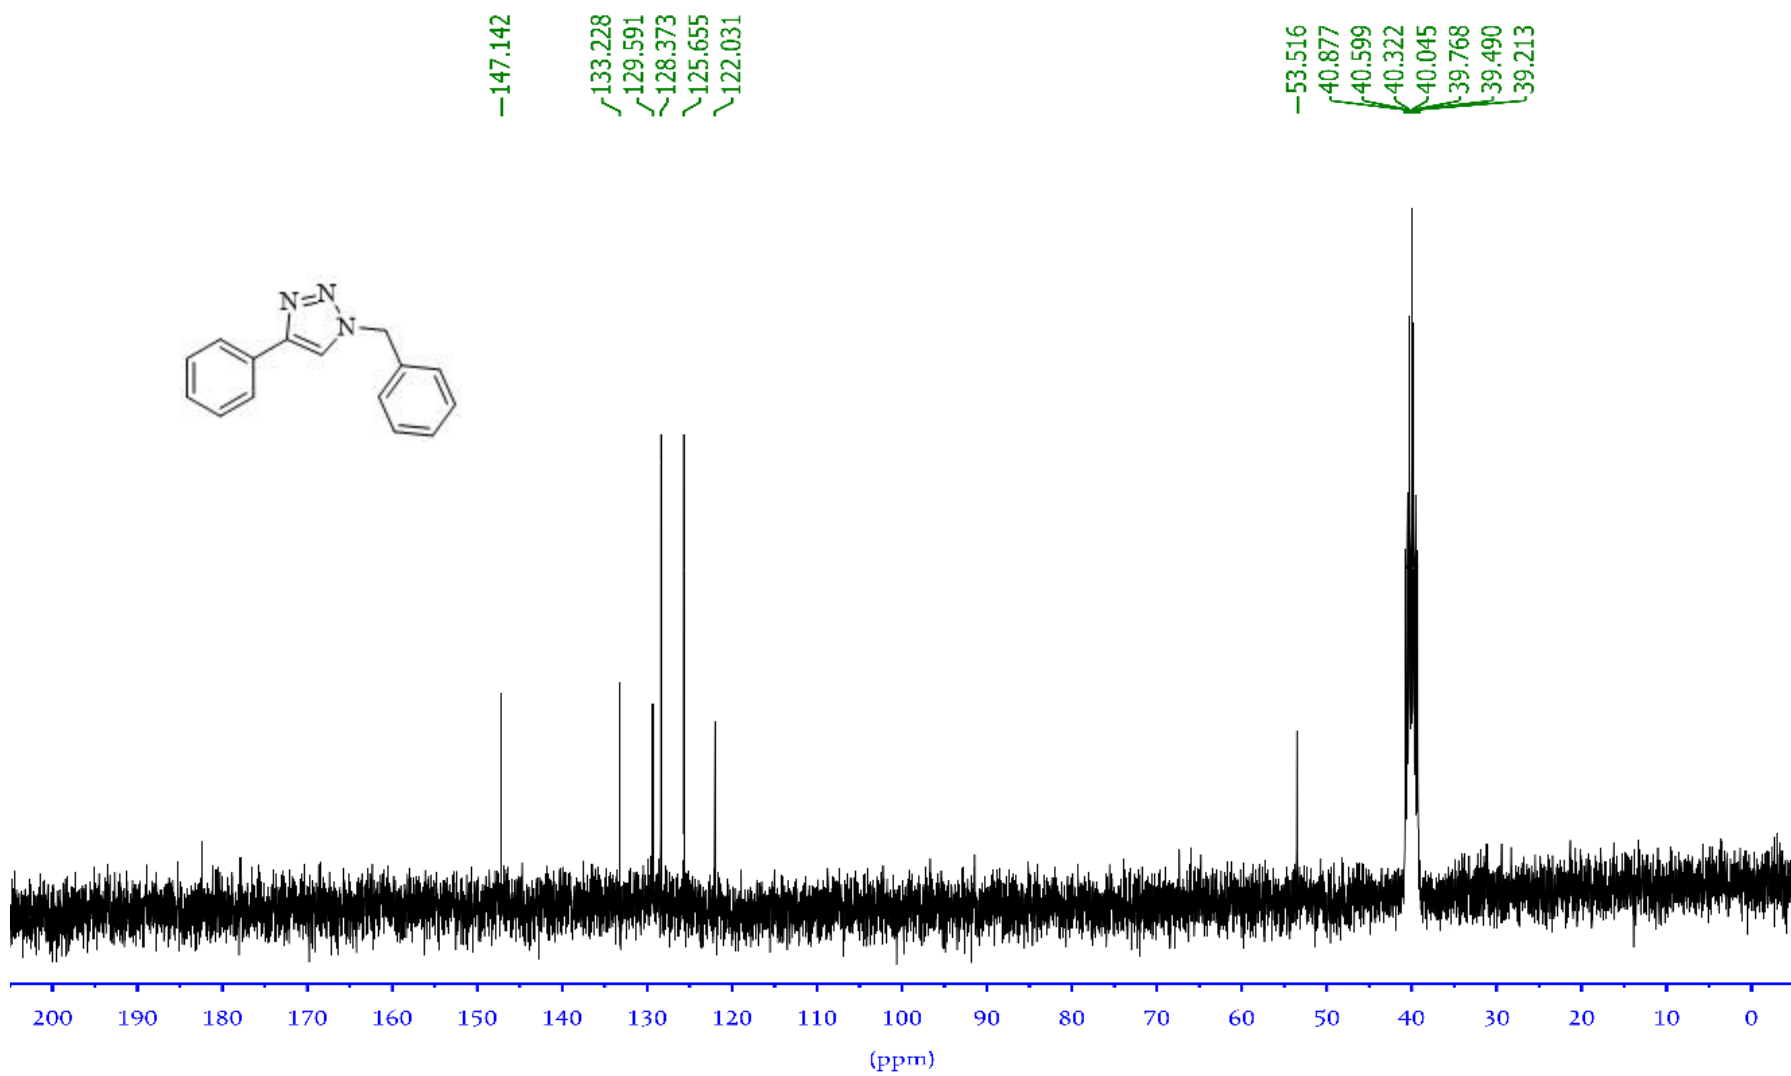

Figure S2:  $^{13}\text{C}$ -NMR of 1-benzyl-4-phenyl-1H-1,2,3-triazole

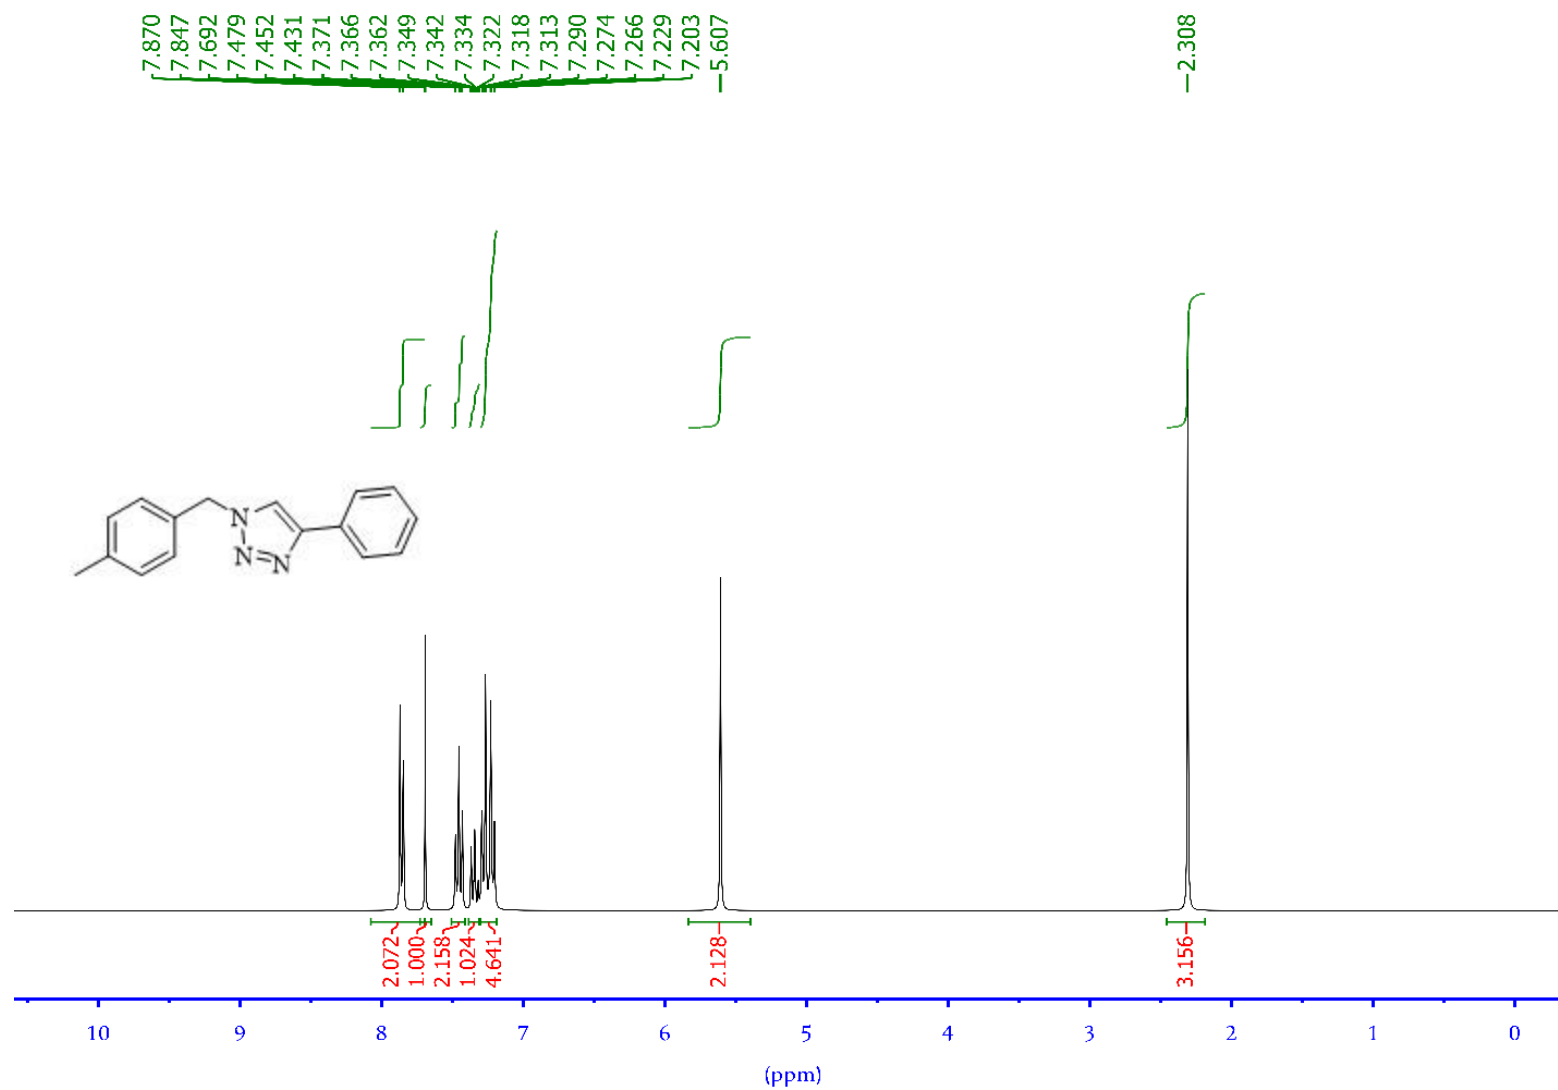

Figure S3: <sup>1</sup>H-NMR of 1-(4-methylbenzyl)-4-phenyl-1H-1,2,3-triazole



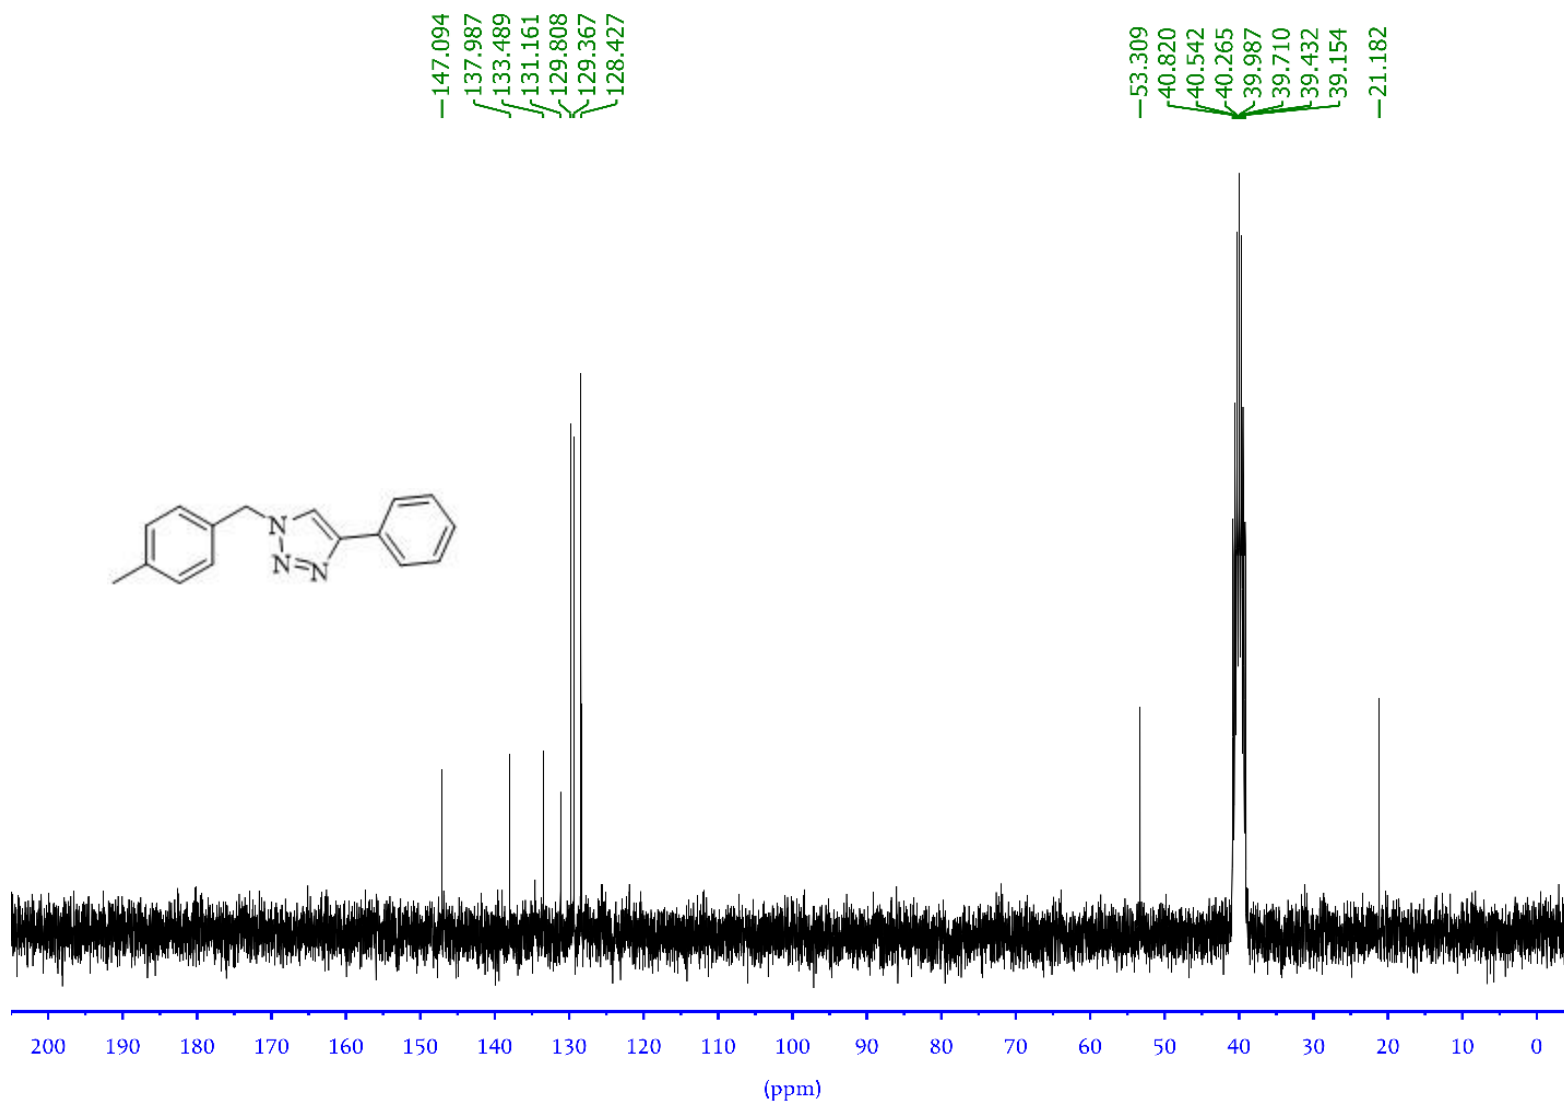

Figure S4: <sup>13</sup>C-NMR of 1-(4-methylbenzyl)-4-phenyl-1H-1,2,3-triazole

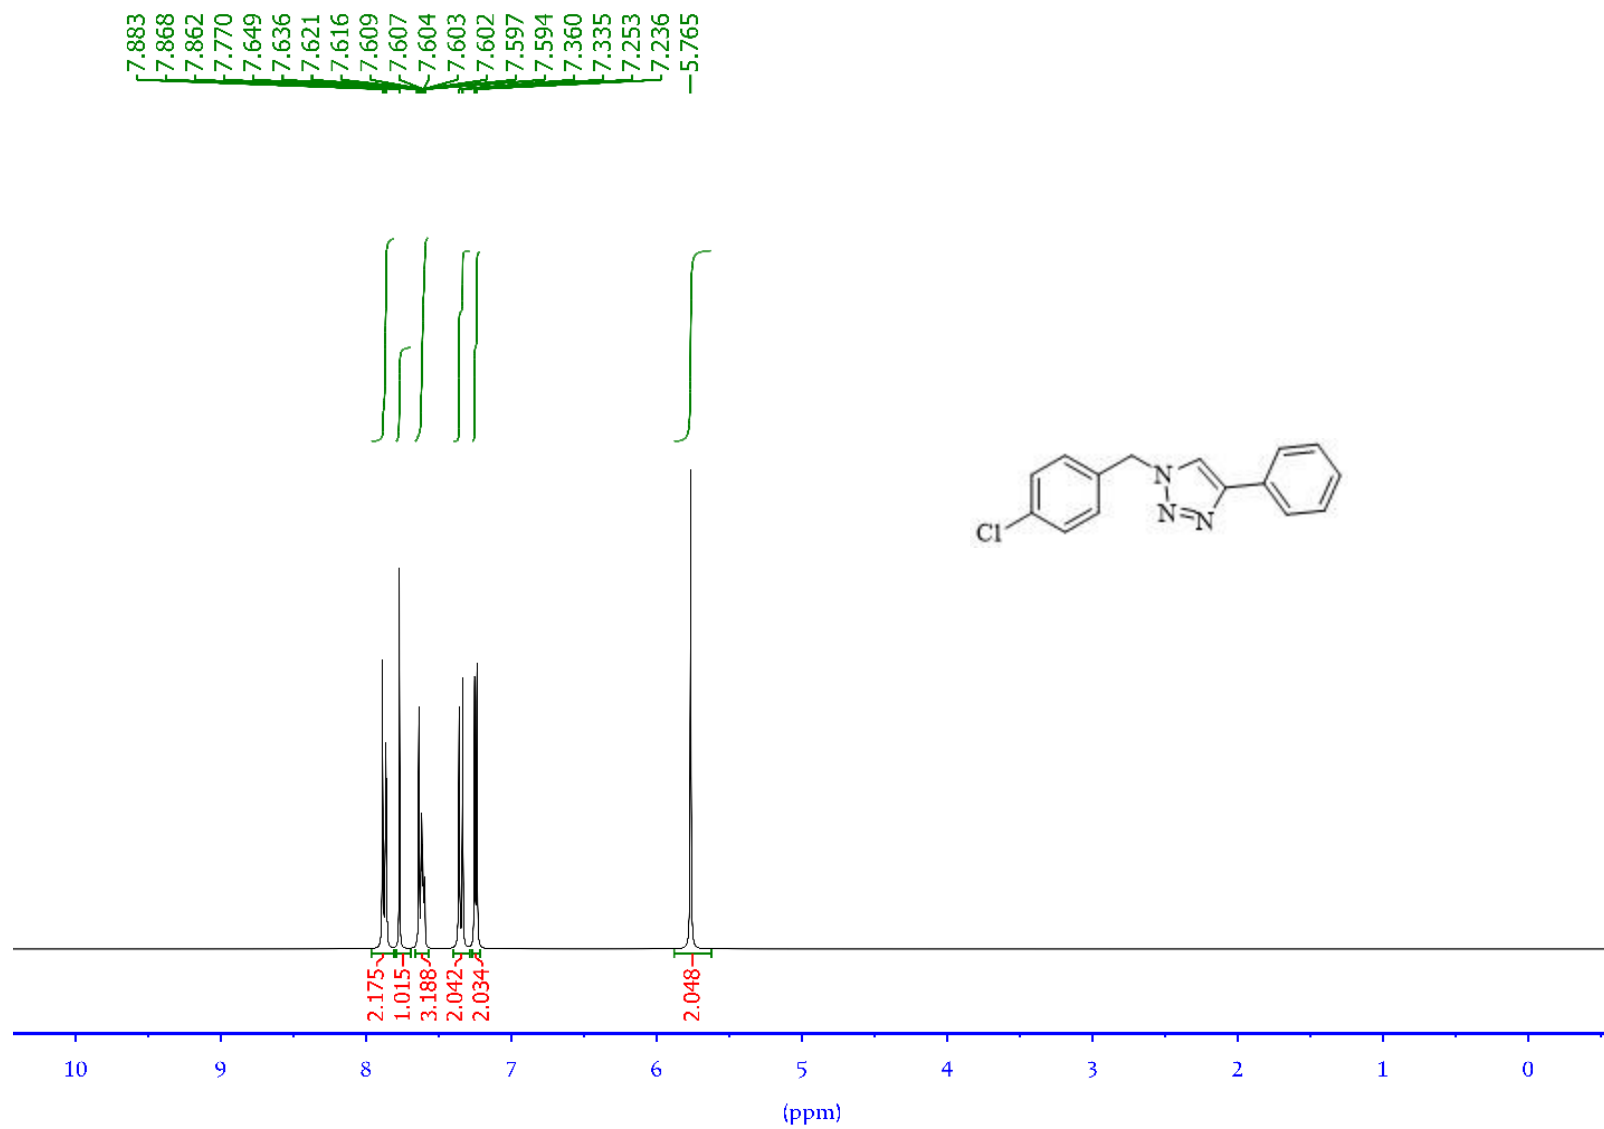

Figure S5: <sup>1</sup>H-NMR of 1-(4-chlorobenzyl)-4-phenyl-1H-1,2,3-triazole

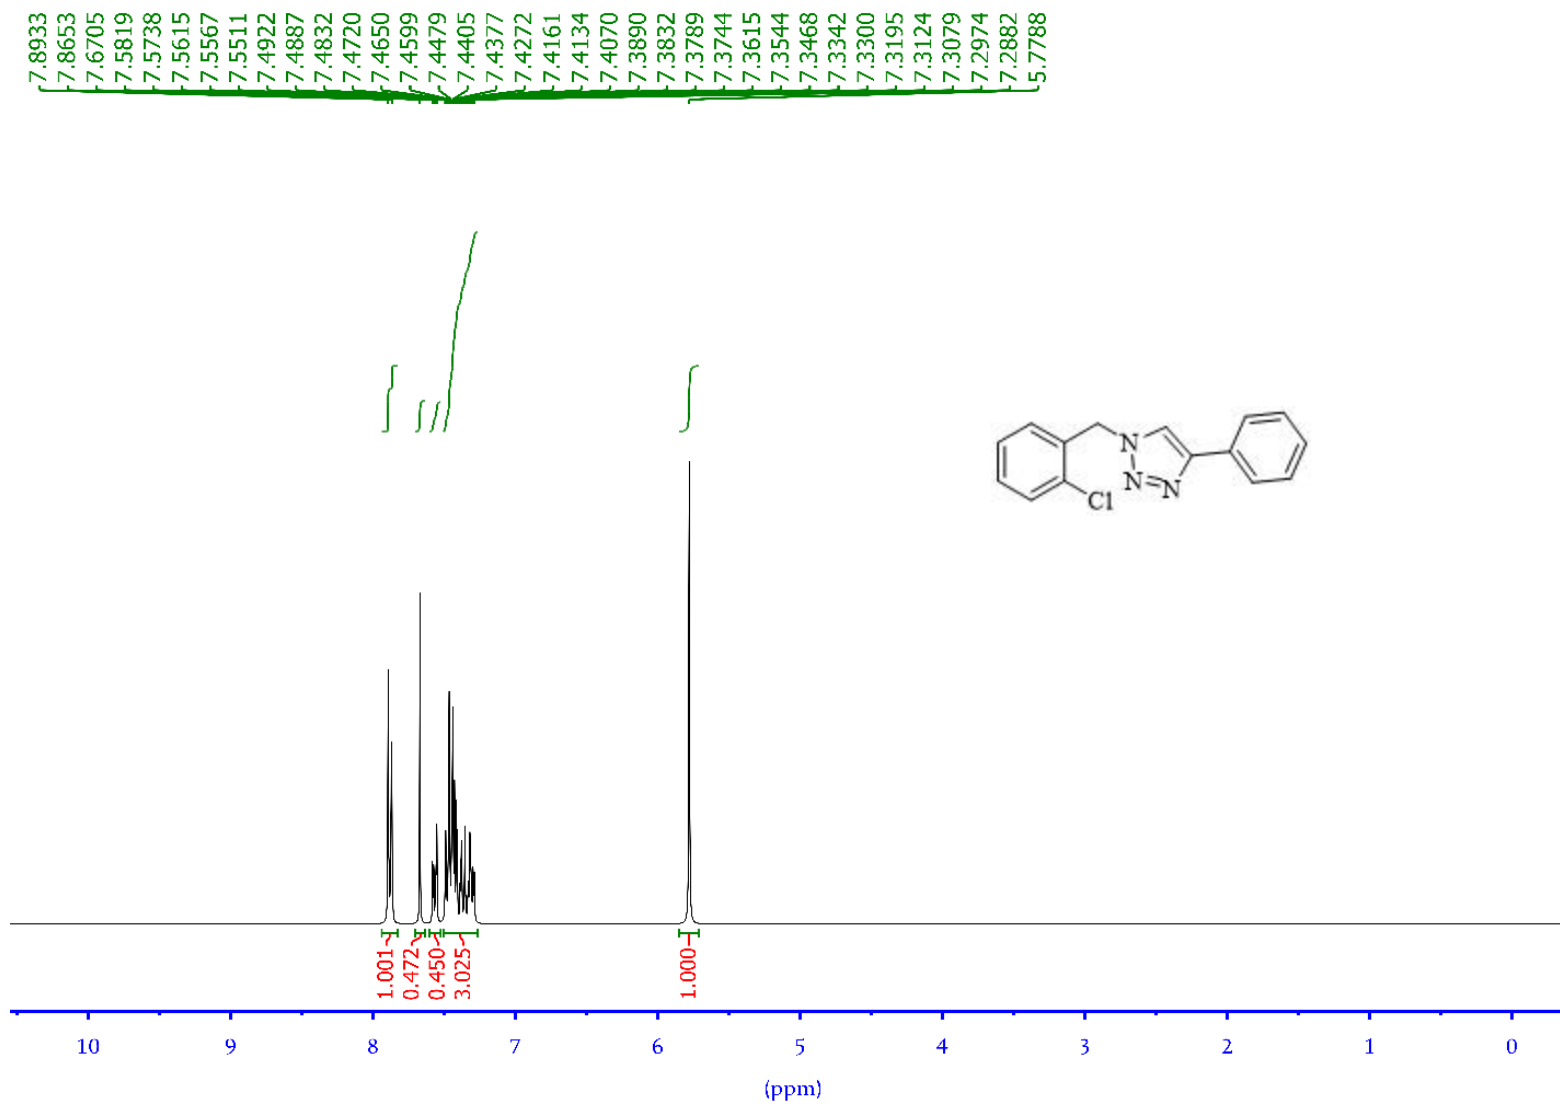

Figure S6: <sup>1</sup>H-NMR of 1-(2-chlorobenzyl)-4-phenyl-1H-1,2,3-triazole

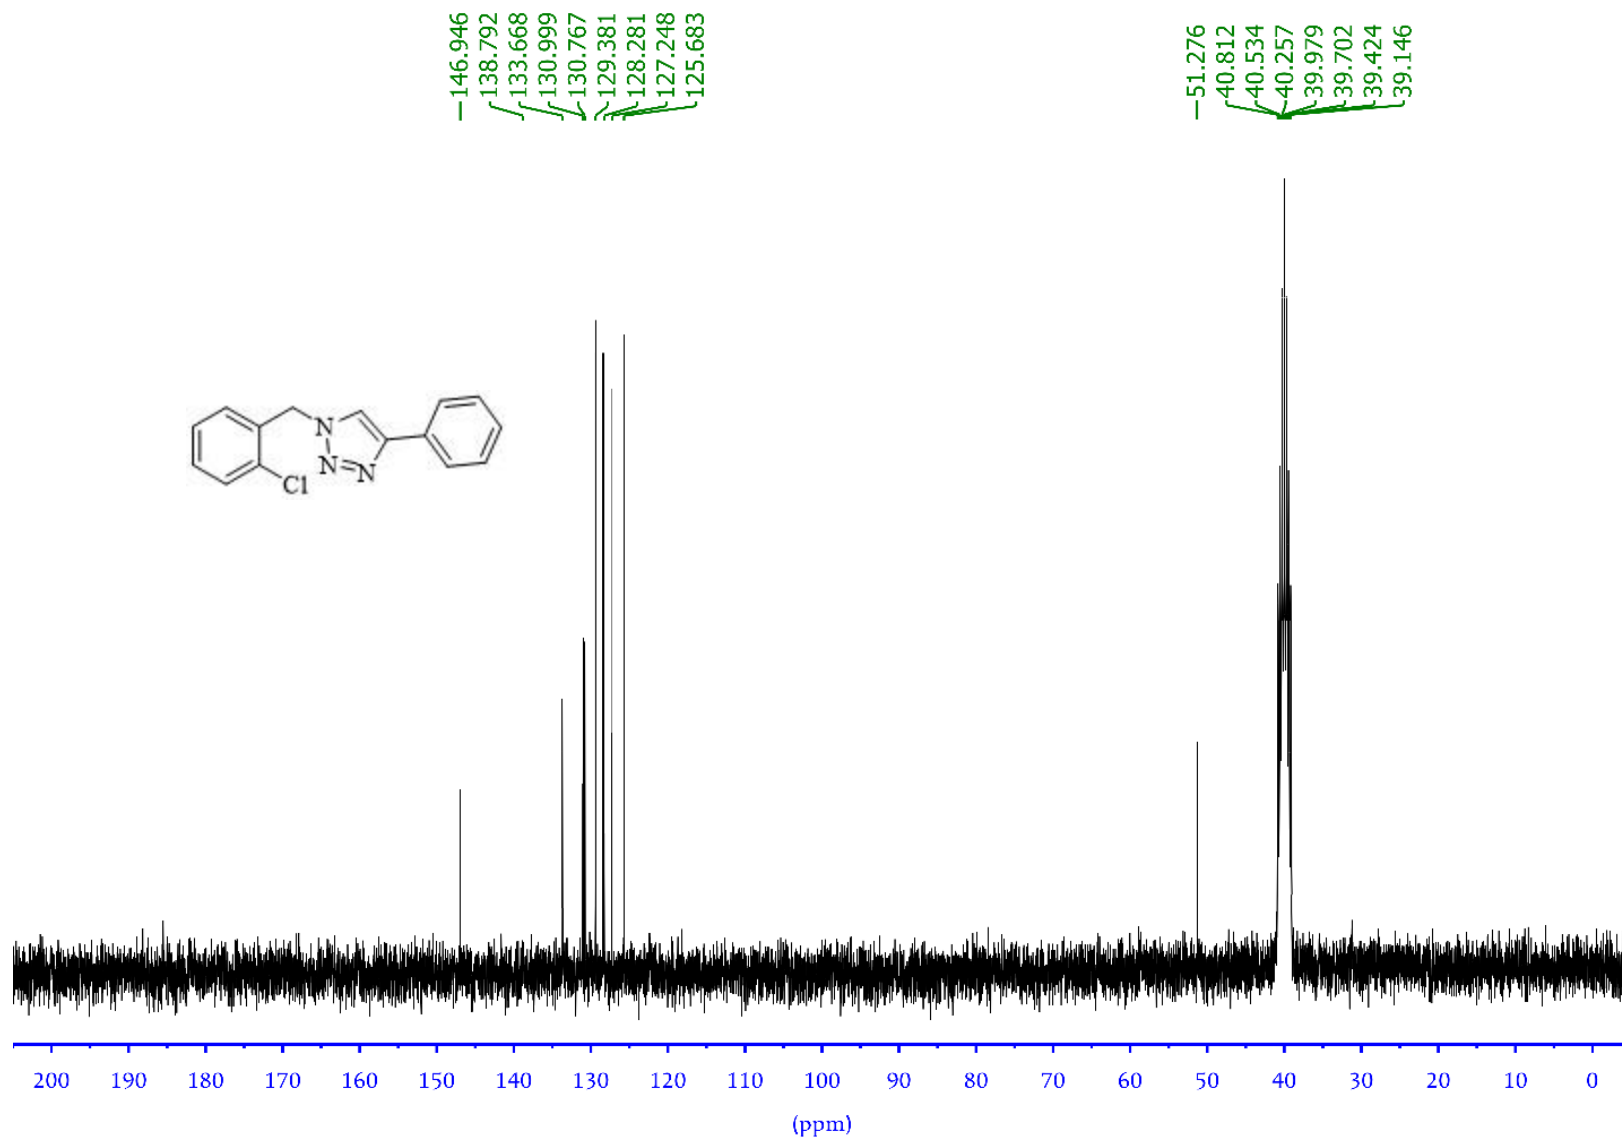

Figure S7: <sup>13</sup>C-NMR of 1-(2-chlorobenzyl)-4-phenyl-1H-1,2,3-triazole

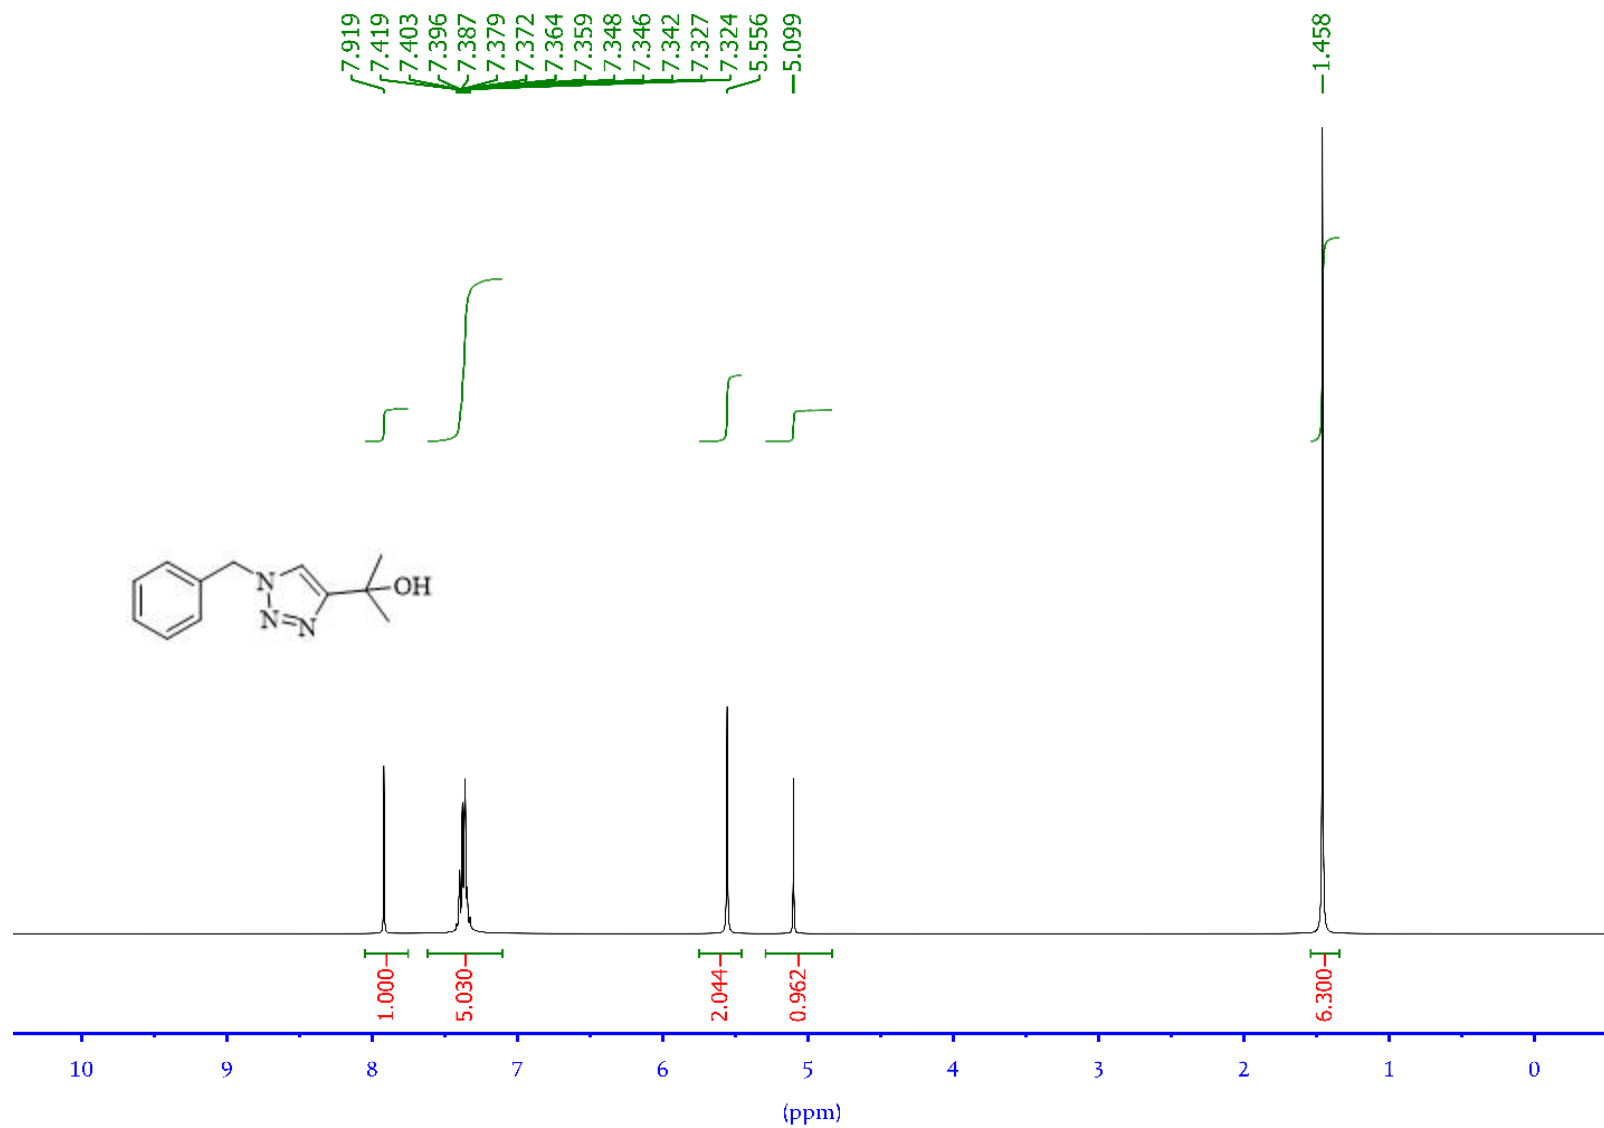

Figure S8: <sup>1</sup>H-NMR of 2-(1-benzyl-1H-1,2,3-triazol-4-yl)propan-2-ol

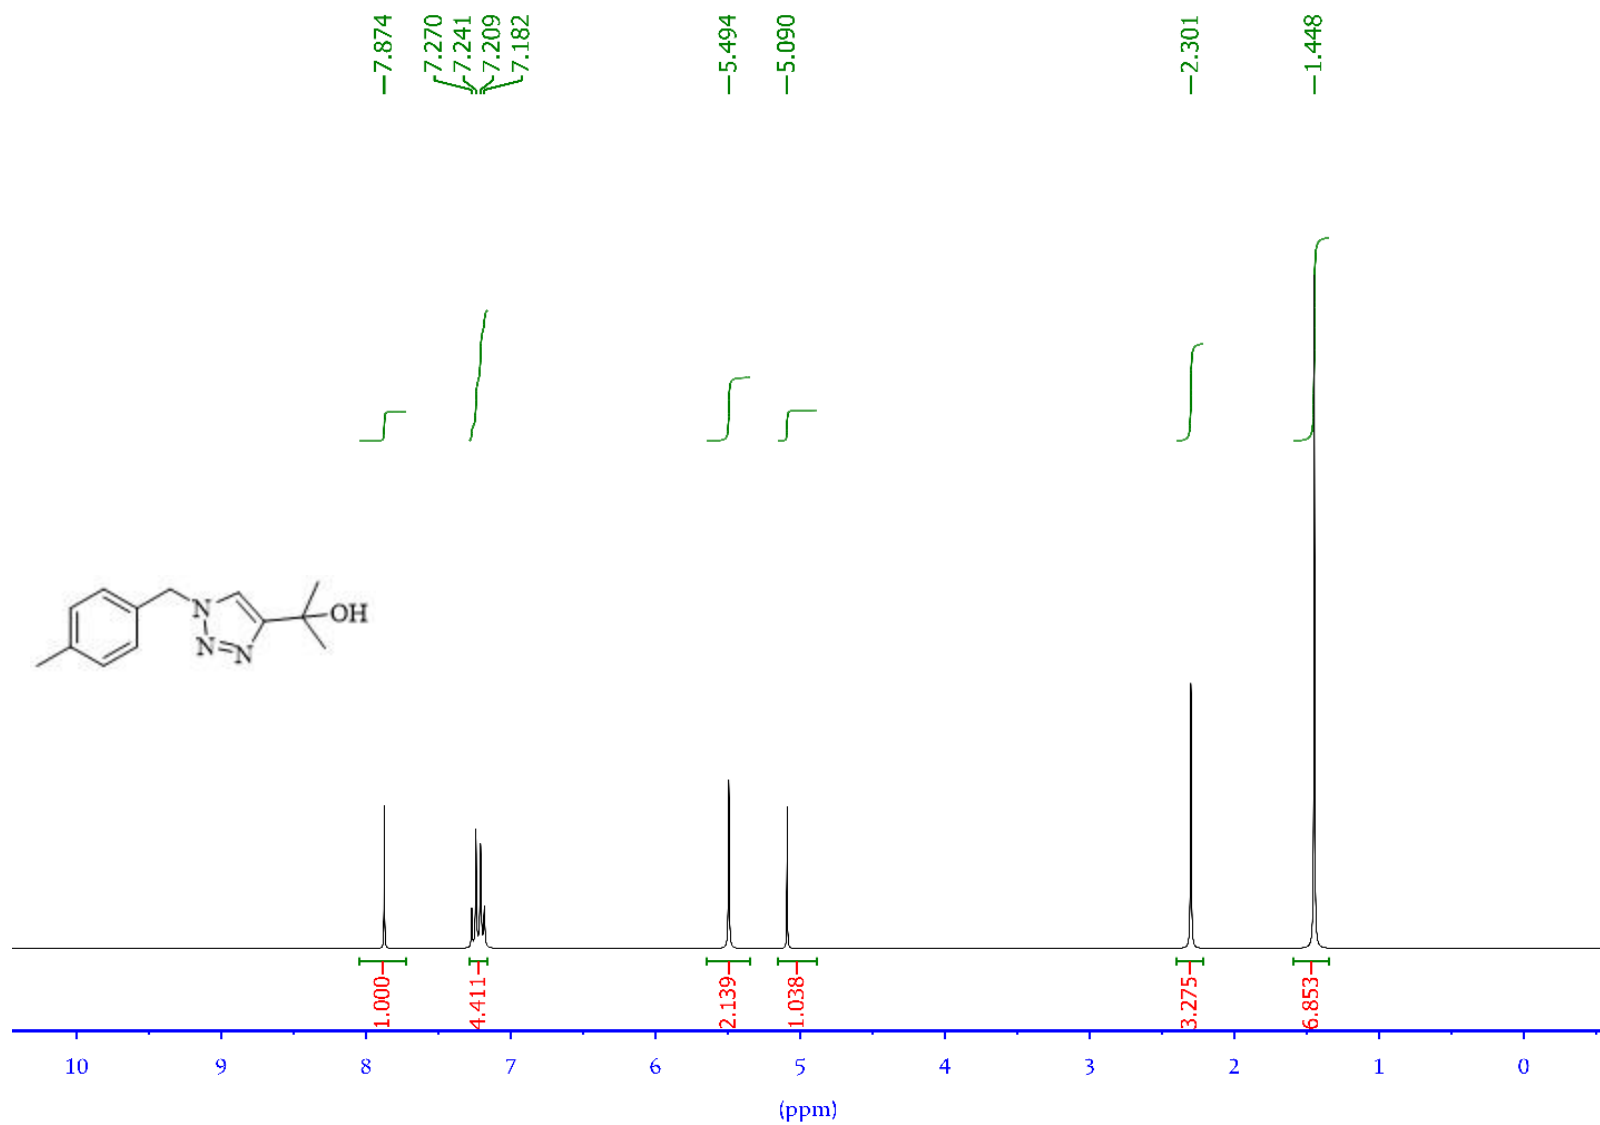

Figure S9: <sup>1</sup>H-NMR of 2-(1-(4-methylbenzyl)-1H-1,2,3-triazol-4-yl)propan-2-ol

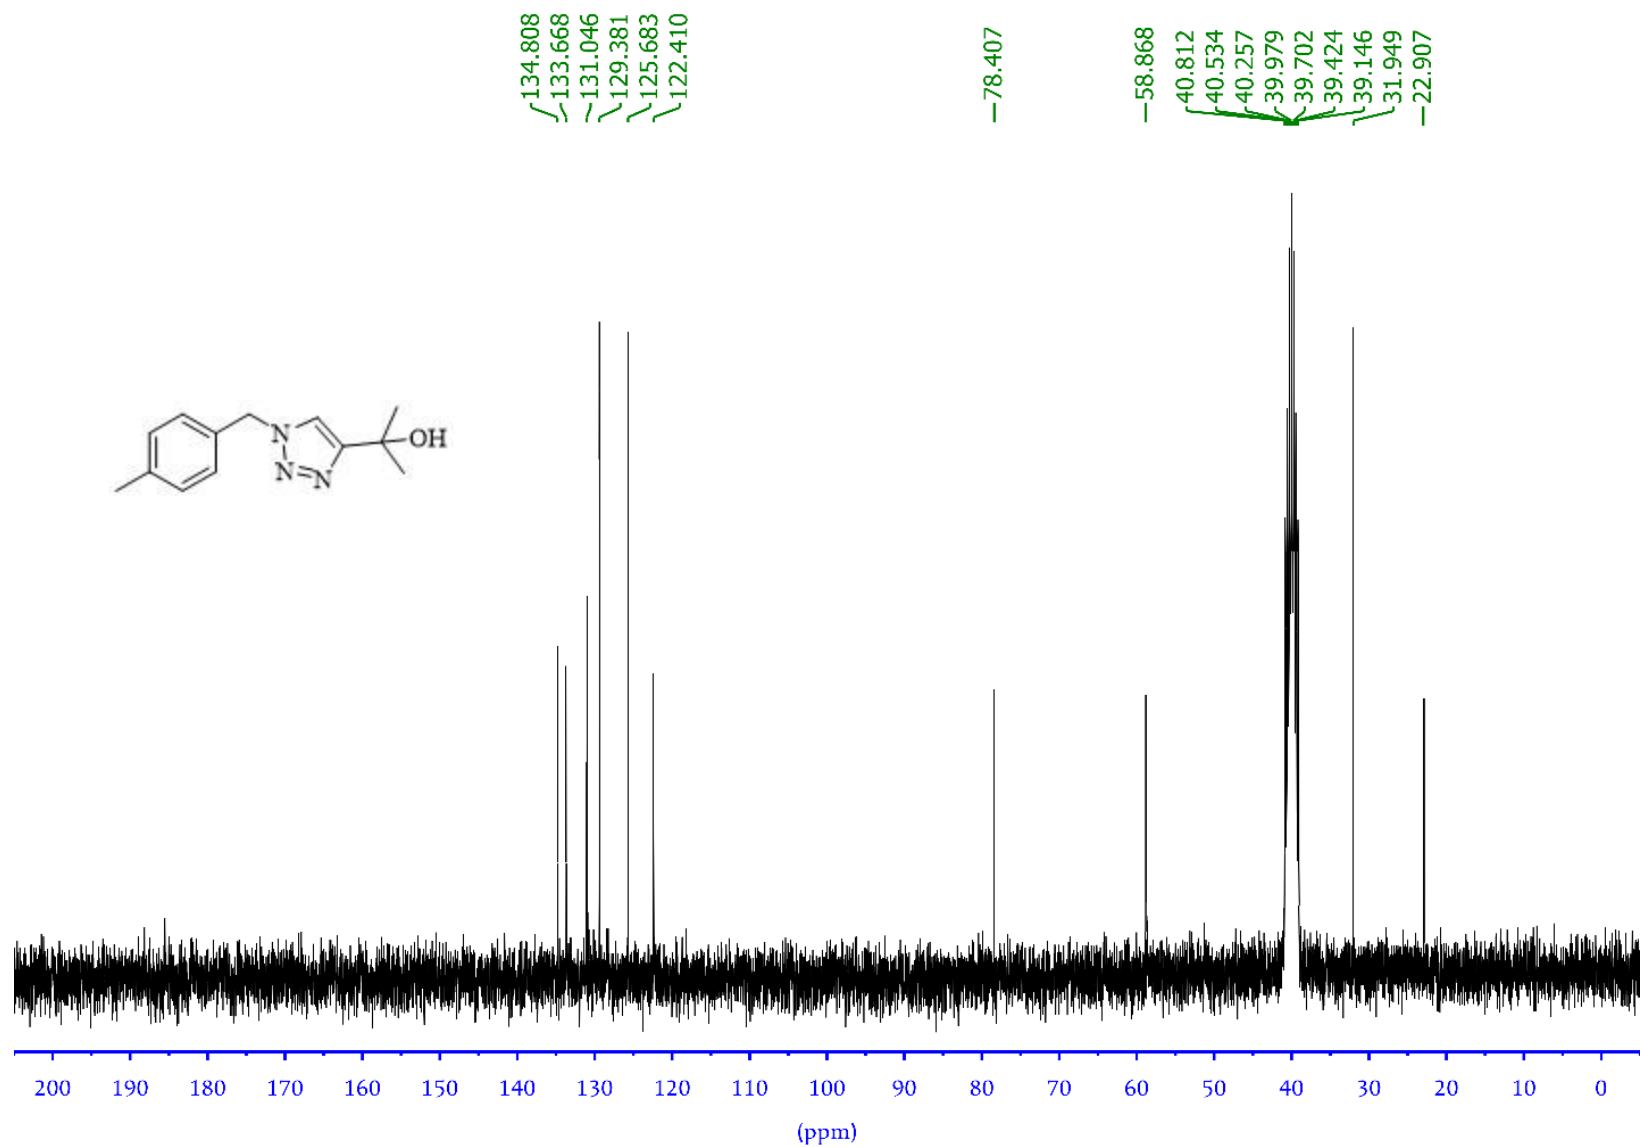

Figure S10: <sup>13</sup>C-NMR of 2-(1-(4-methylbenzyl)-1H-1,2,3-triazol-4-yl)propan-2-ol

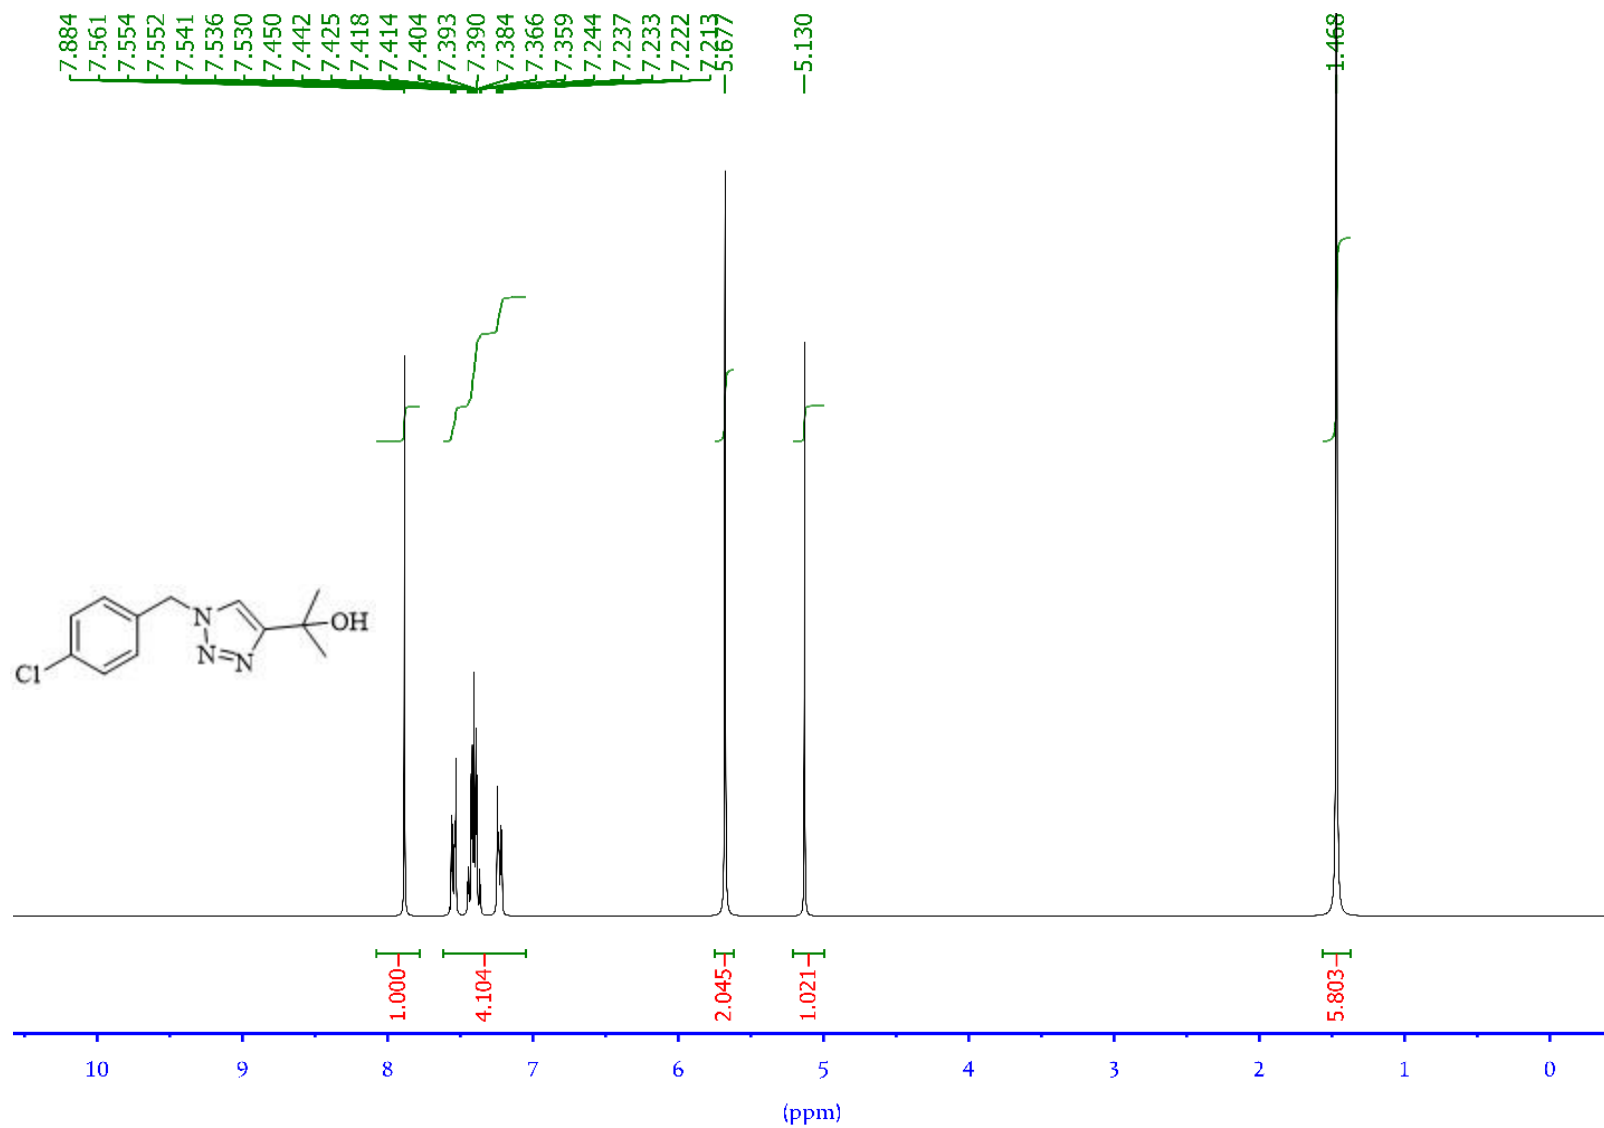

Figure S11: <sup>1</sup>H-NMR of 2-(1-(4-chlorobenzyl)-1H-1,2,3-triazol-4-yl)propan-2-ol



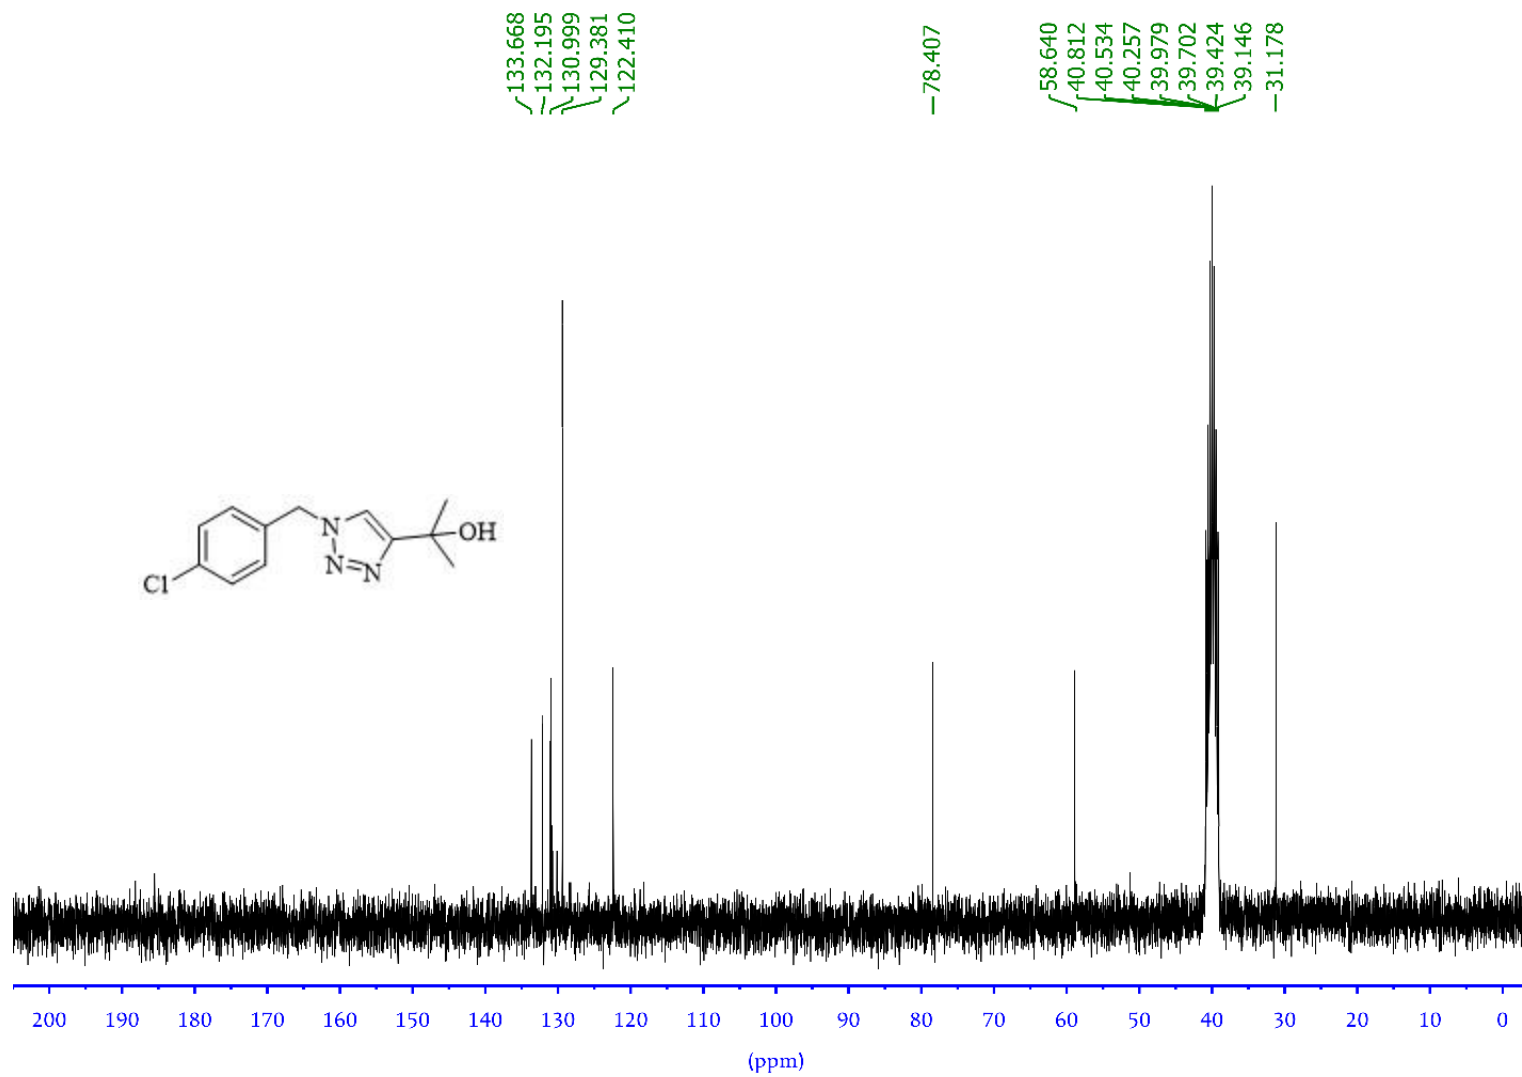

Figure S12: <sup>13</sup>C-NMR of 2-(1-(4-chlorobenzyl)-1H-1,2,3-triazol-4-yl)propan-2-ol

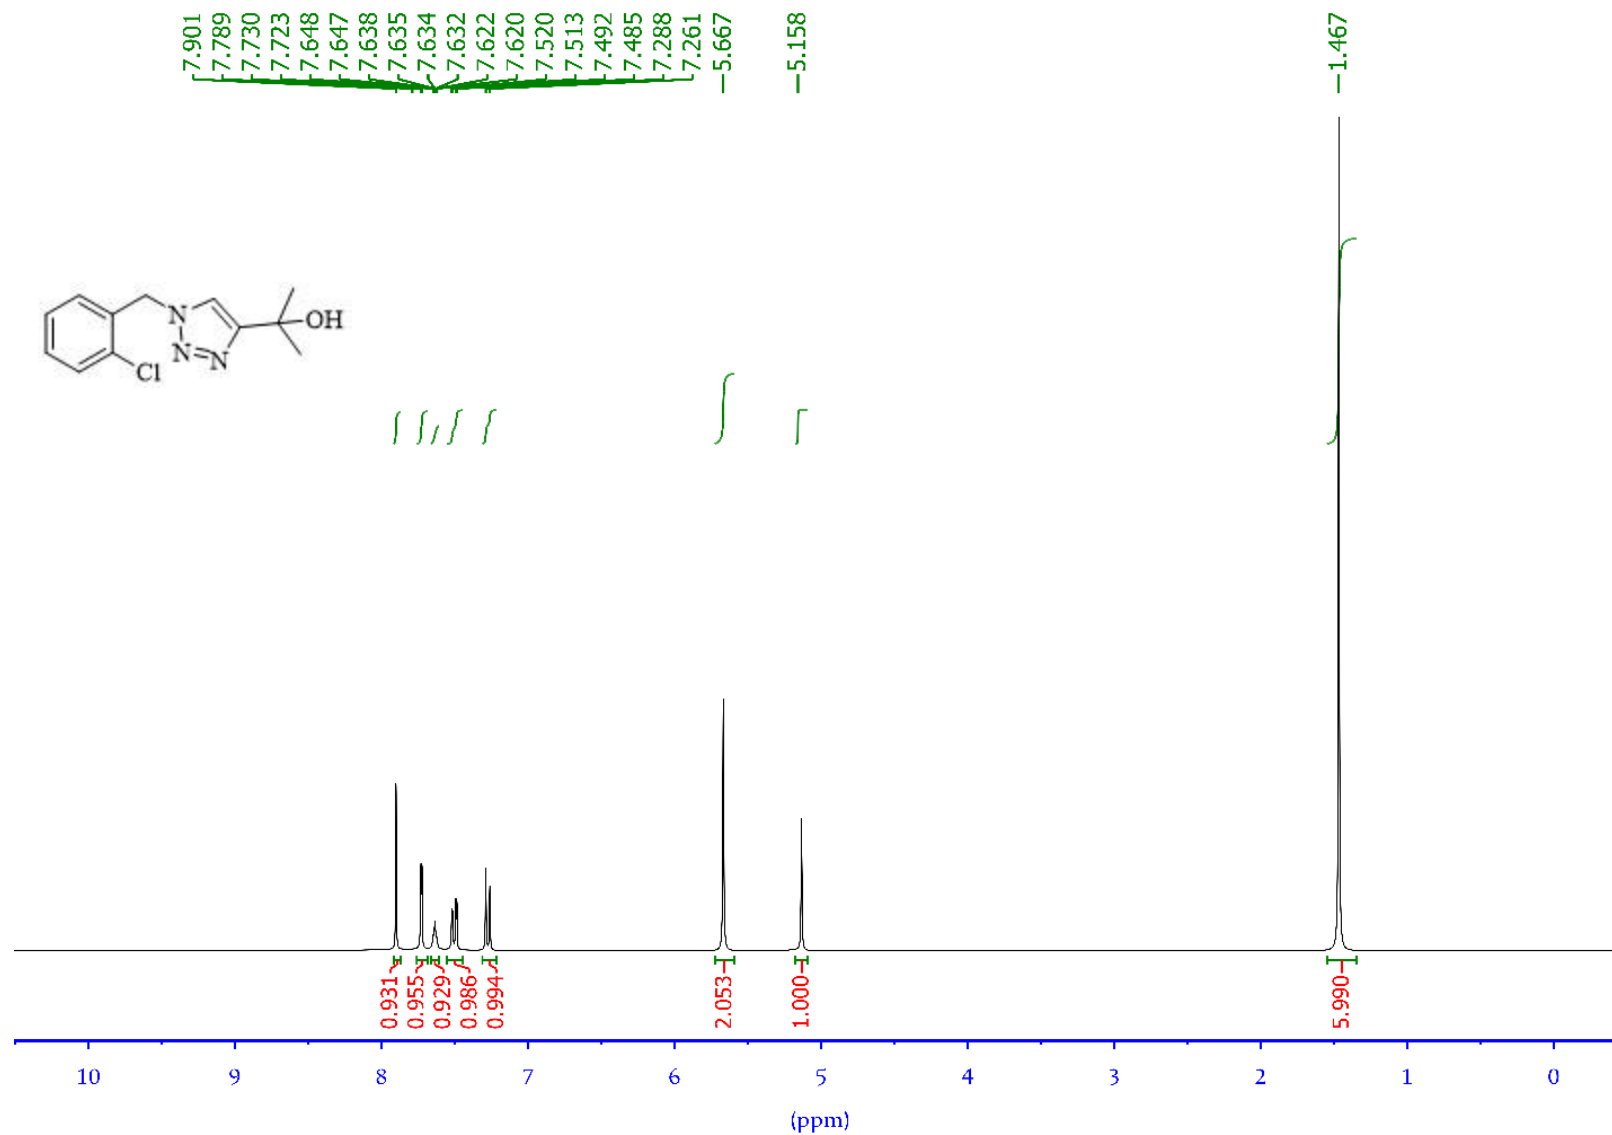

Figure S13: <sup>1</sup>H-NMR of 2-(1-(2-chlorobenzyl)-1H-1,2,3-triazol-4-yl)propan-2-ol

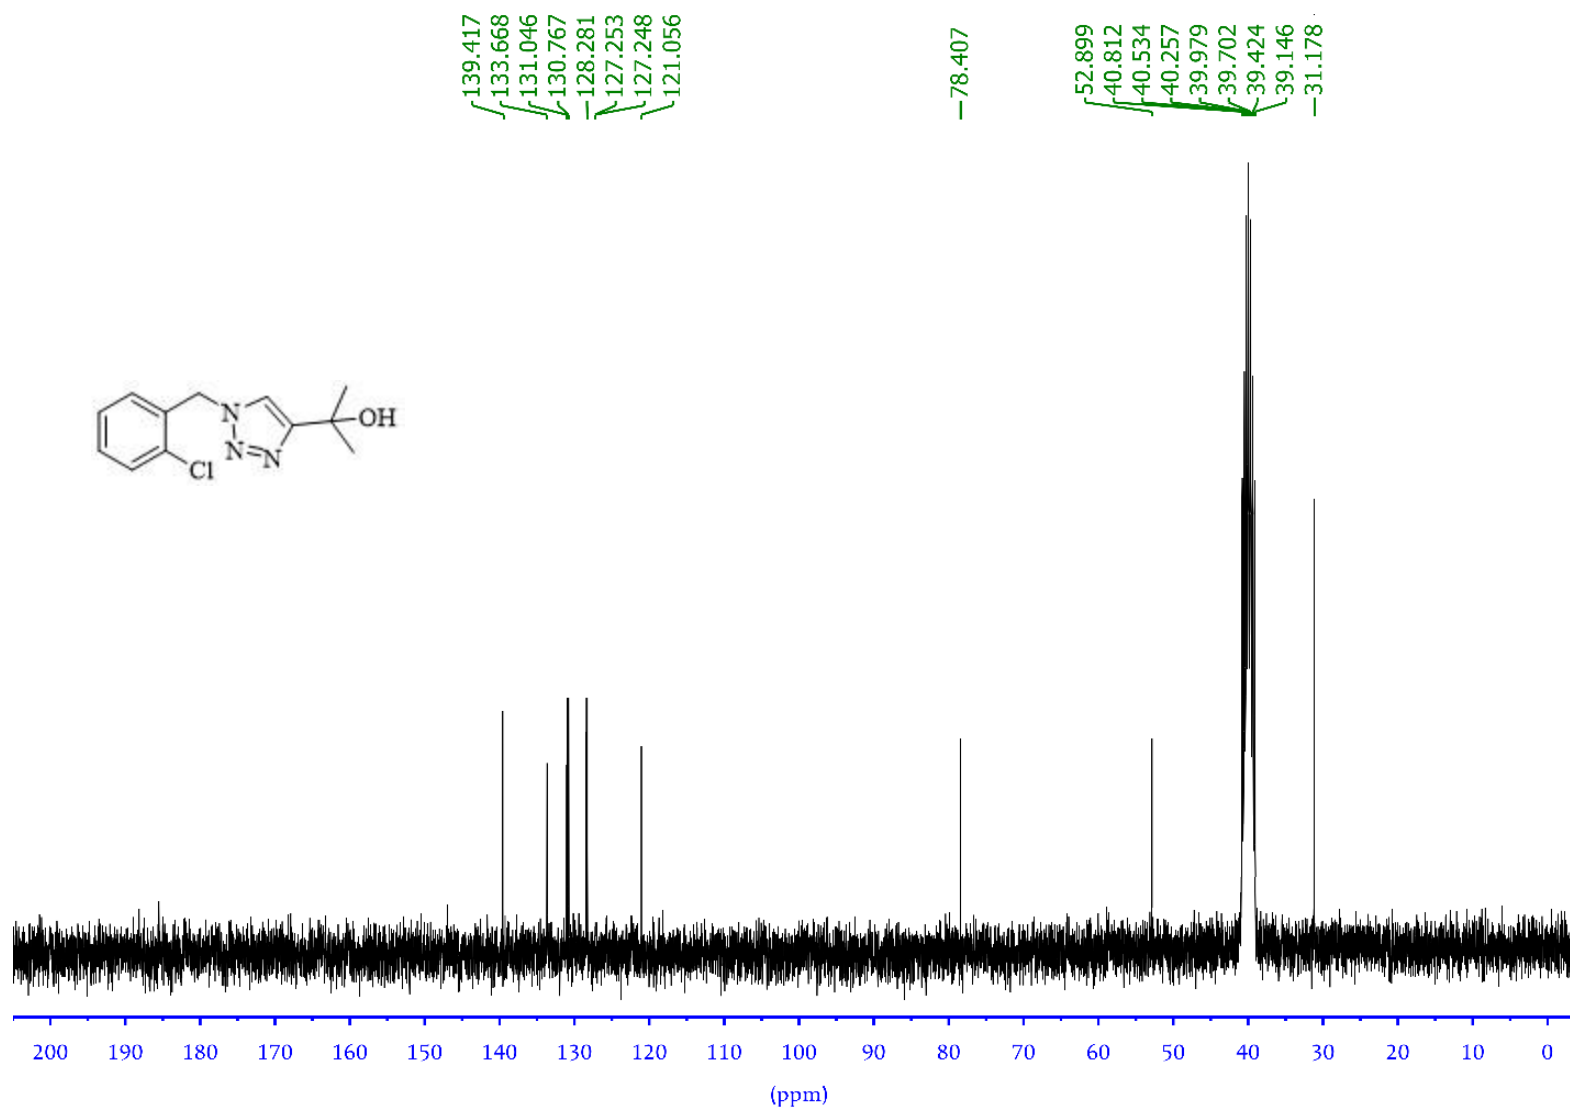

Figure S14: <sup>13</sup>C-NMR of 2-(1-(2-chlorobenzyl)-1H-1,2,3-triazol-4-yl)propan-2-ol

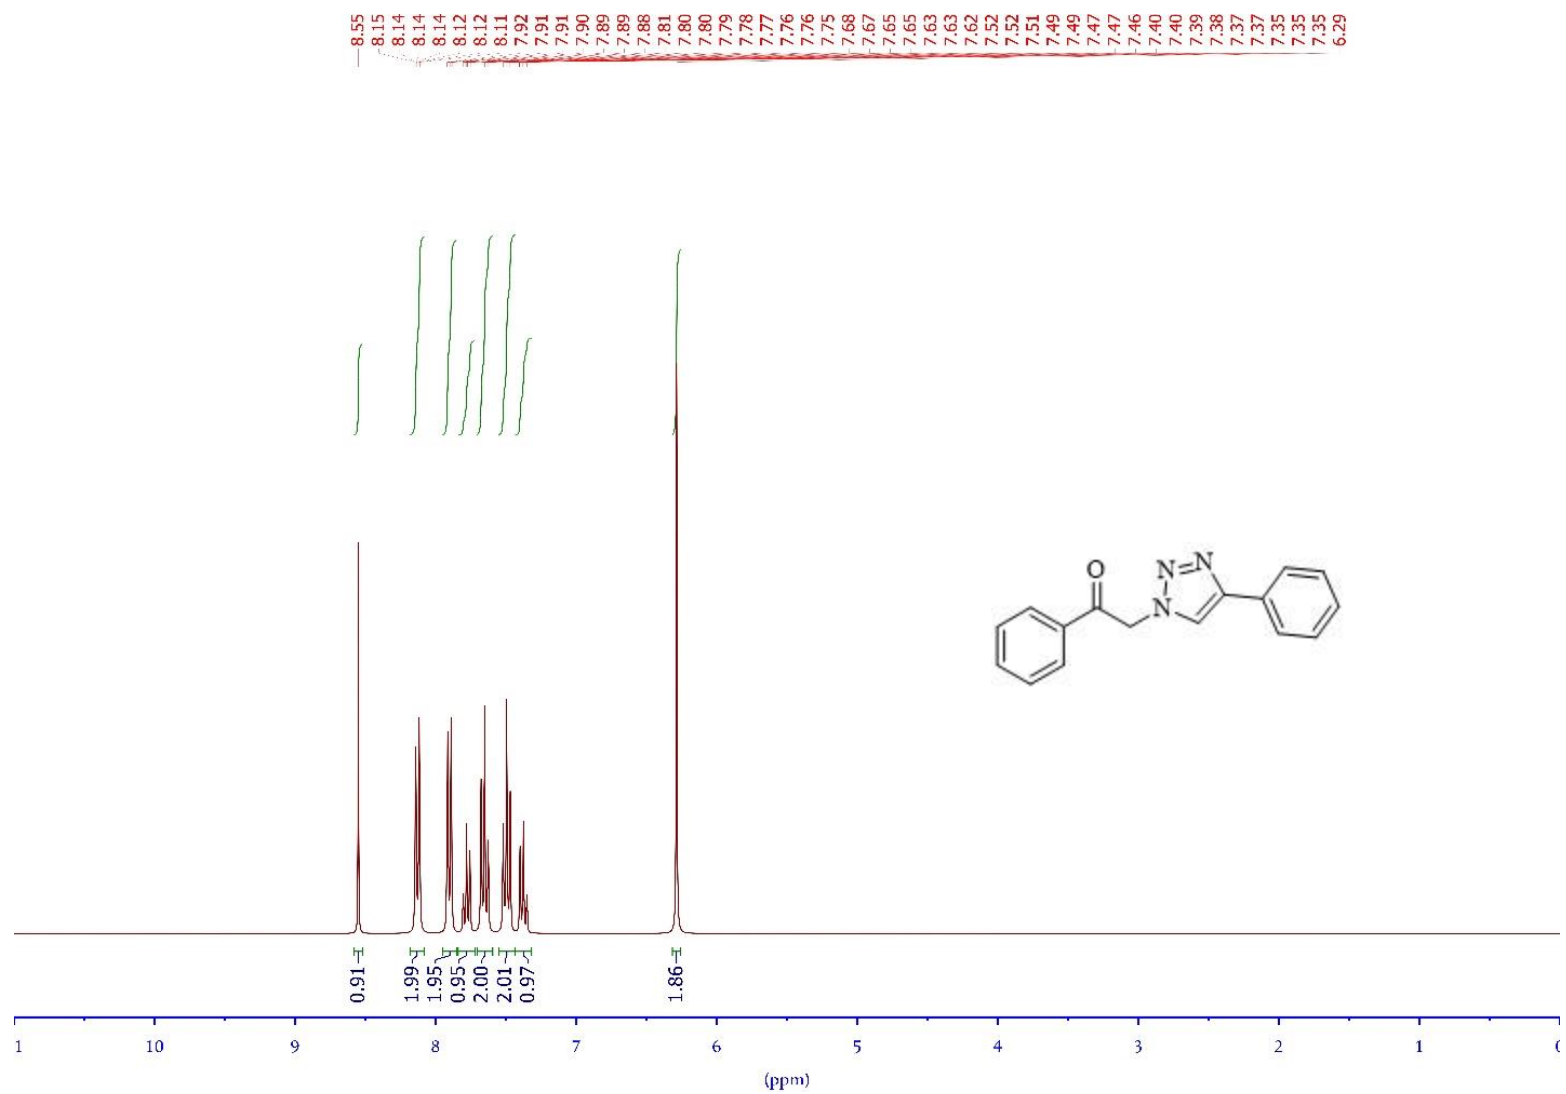

Figure S15: <sup>1</sup>H-NMR of 1-Phenyl-2-(4-phenyl-1H-1,2,3-triazol-1-yl)ethanone

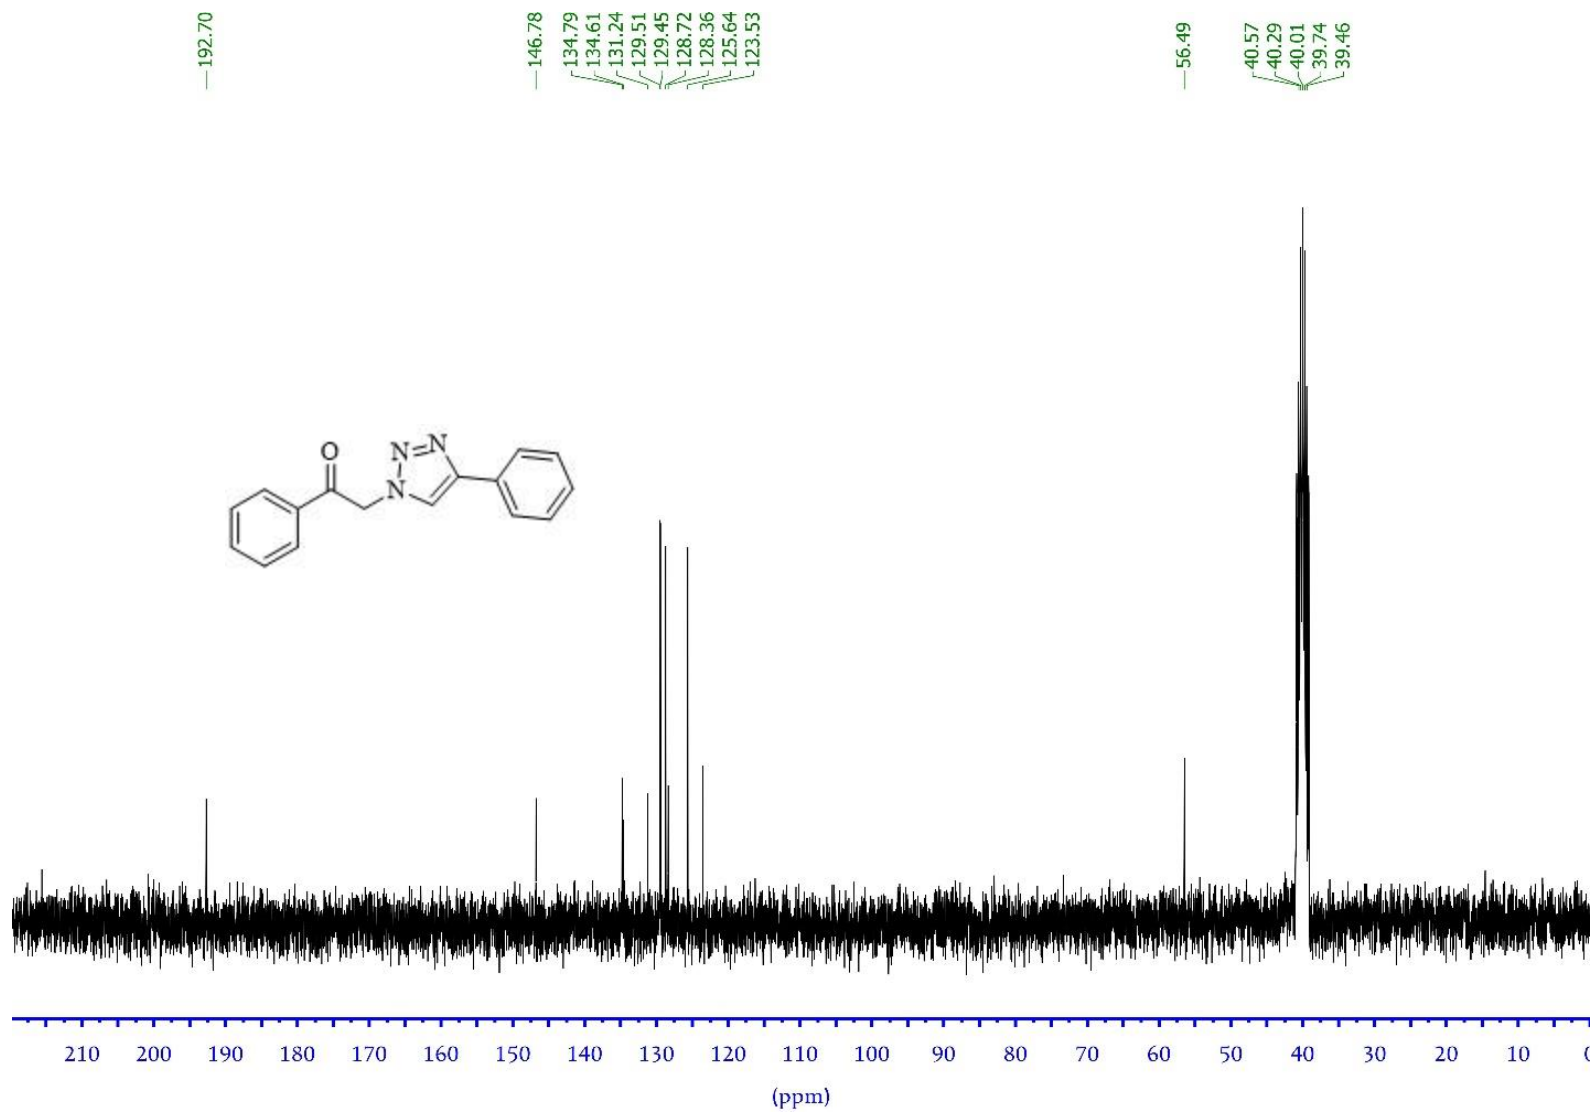

Figure S16: <sup>13</sup>C-NMR of 1-Phenyl-2-(4-phenyl-1H-1,2,3-triazol-1-yl)ethanone

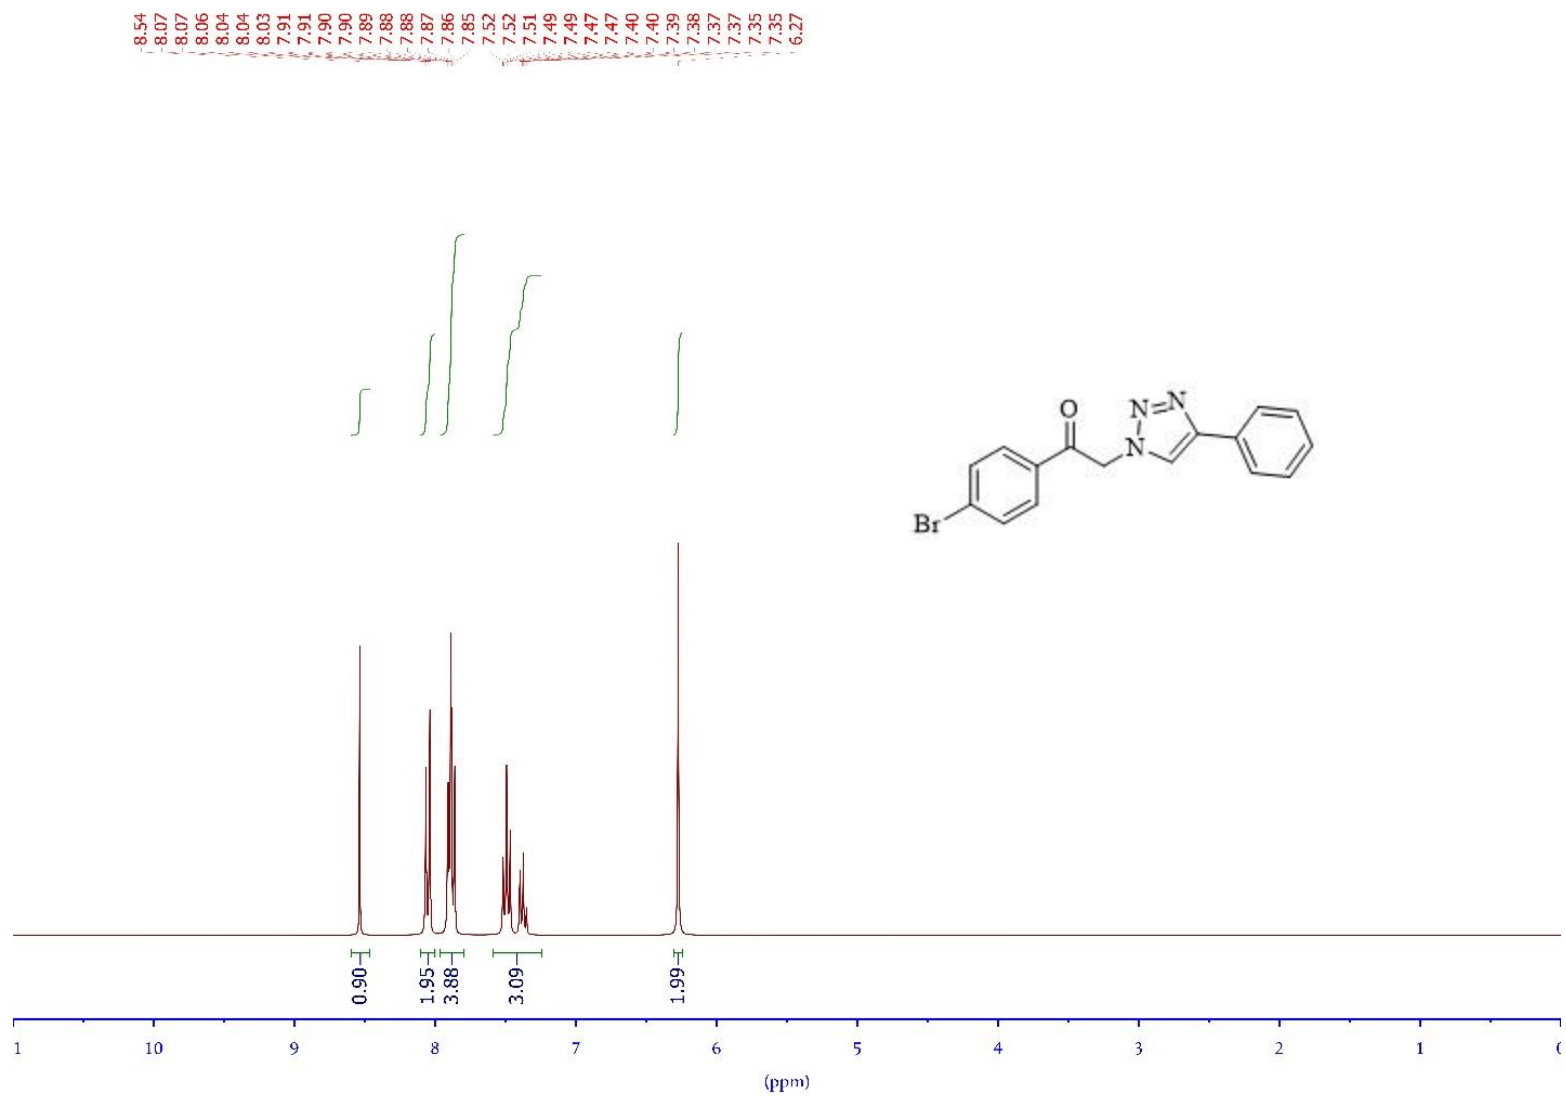

Figure S17: <sup>1</sup>H-NMR of 1-(4-Bromophenyl)-2-(4-phenyl-1H-1,2,3-triazol-1-yl) ethanone

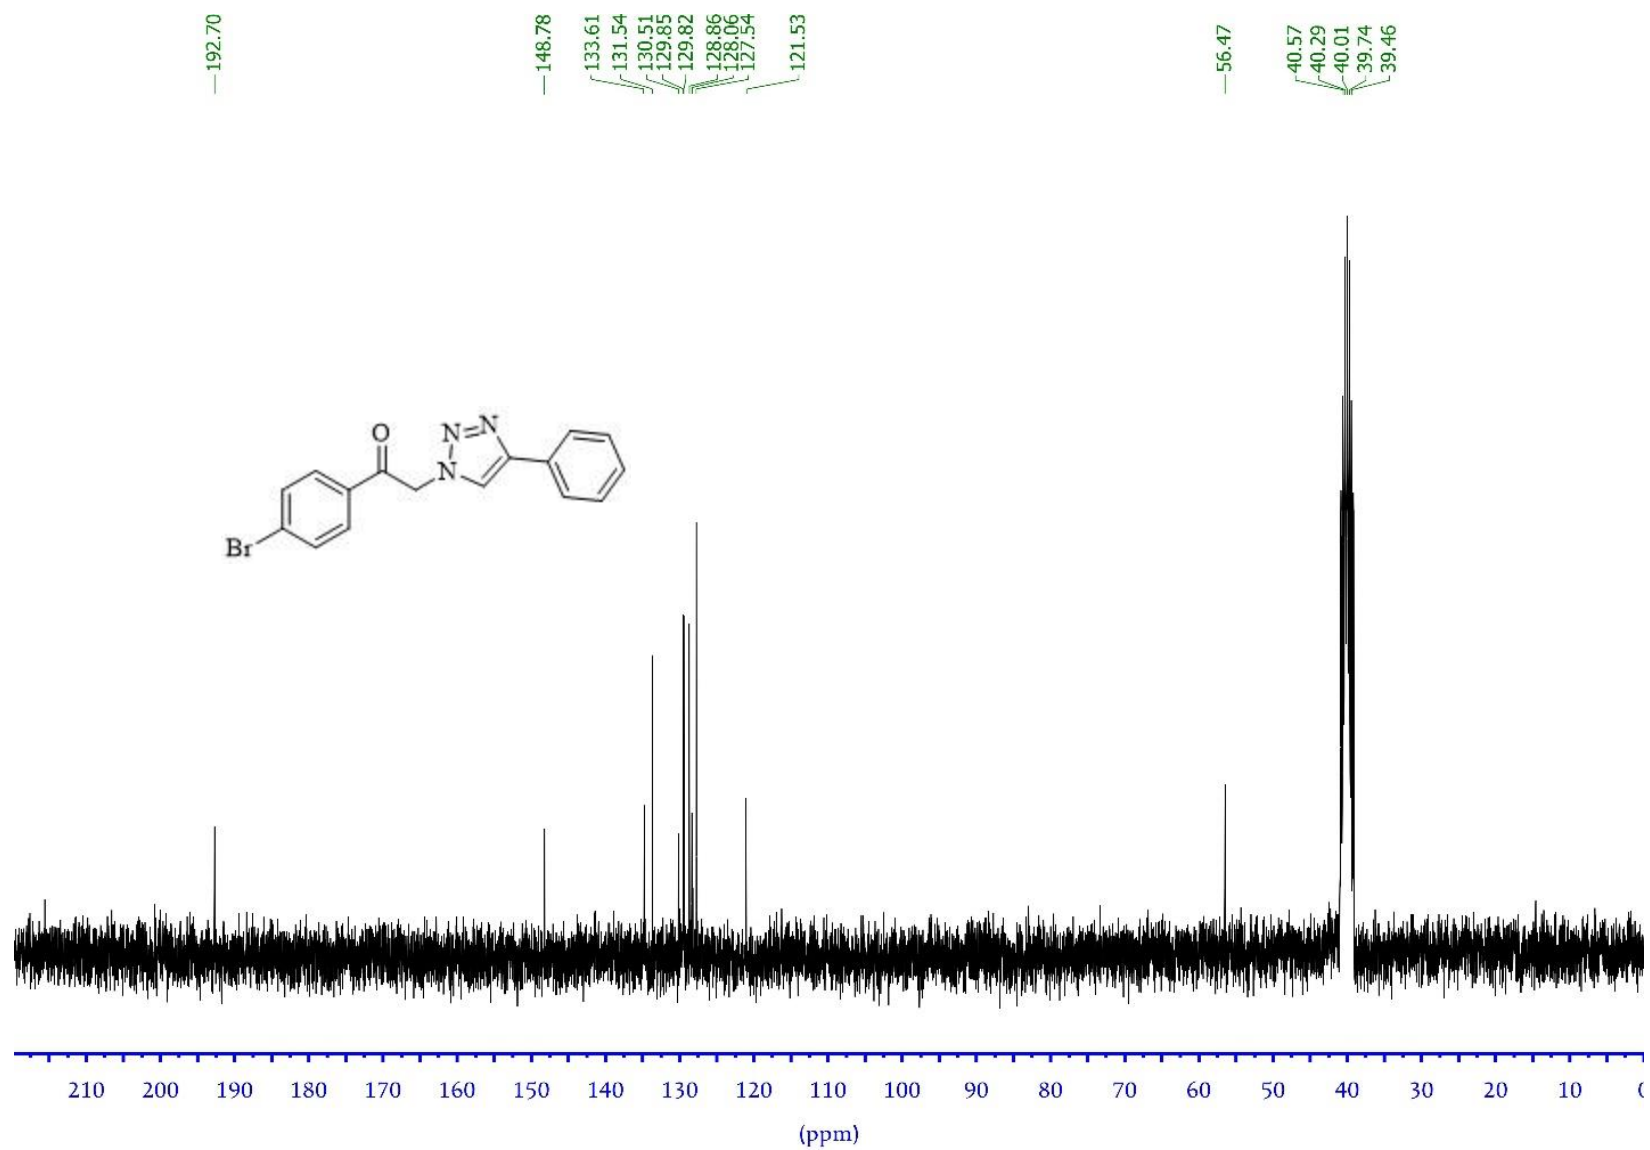

Figure S18:  $^{13}\text{C}$ -NMR of 1-(4-Bromophenyl)-2-(4-phenyl-1H-1,2,3-triazol-1-yl) ethanone

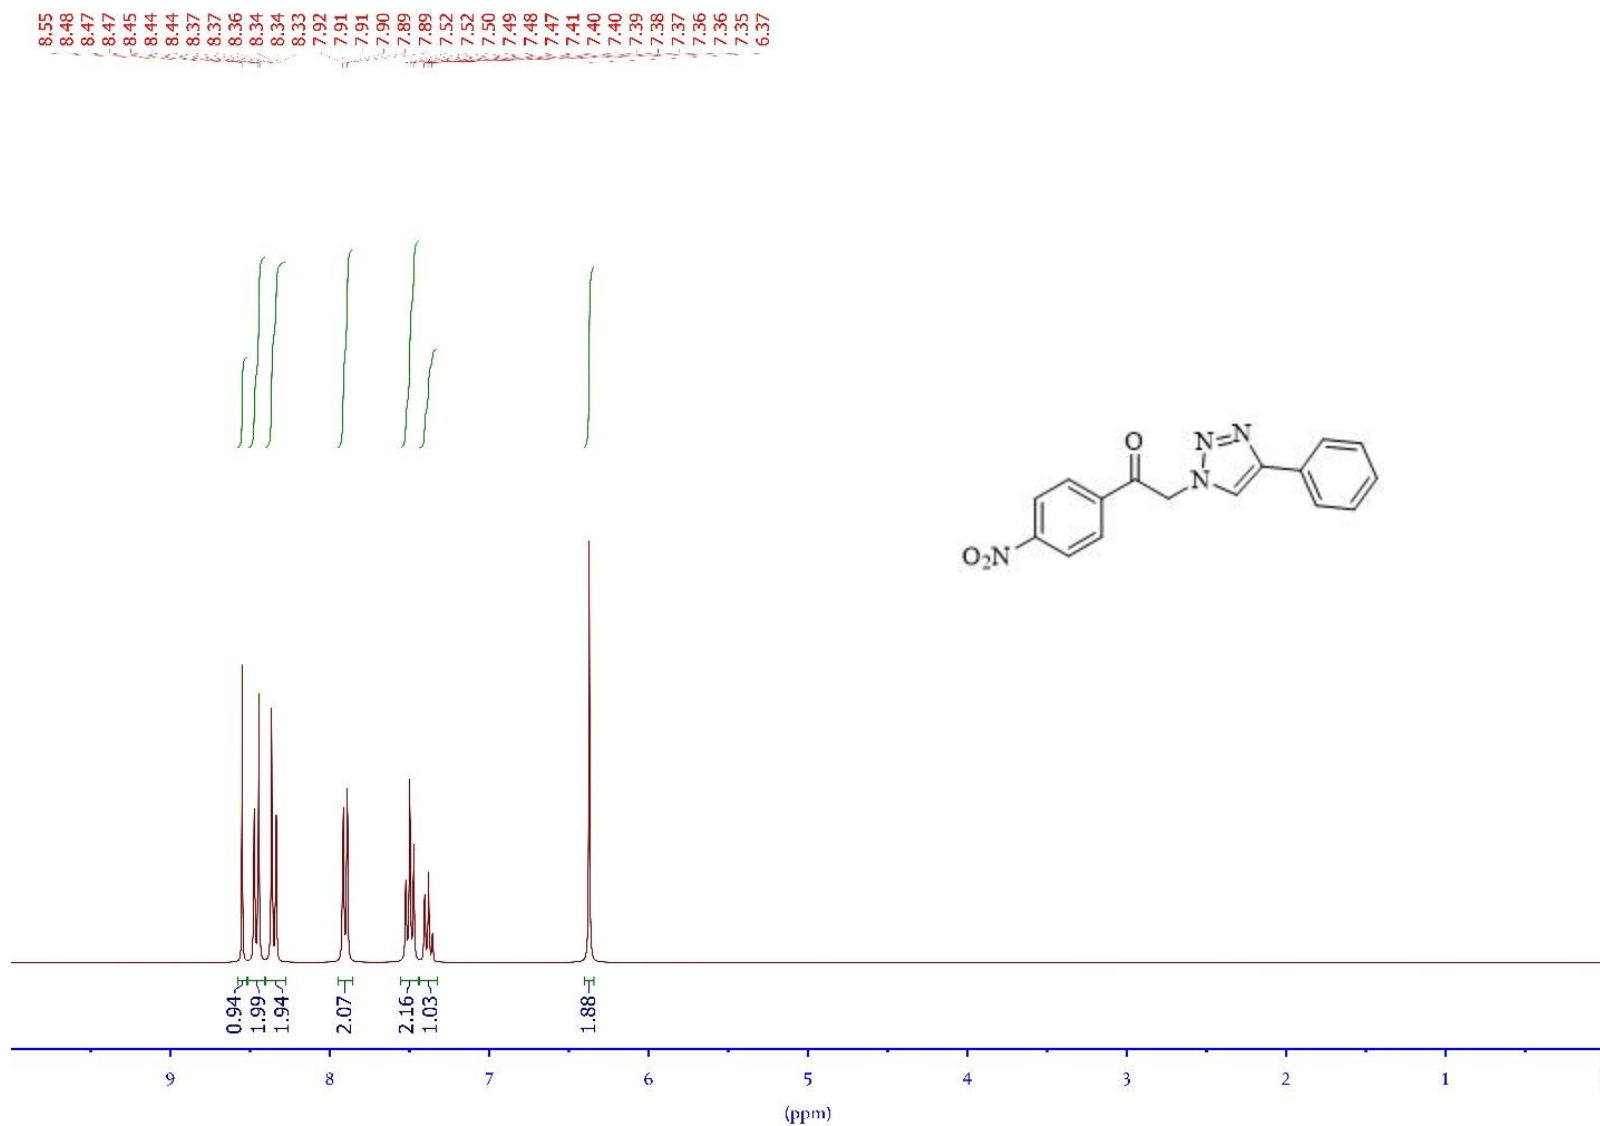

Figure S19:  $^1\text{H-NMR}$  of 1-(4-Nitro phenyl)-2-(4-phenyl-1H-1,2,3-triazol-1-yl)ethanone



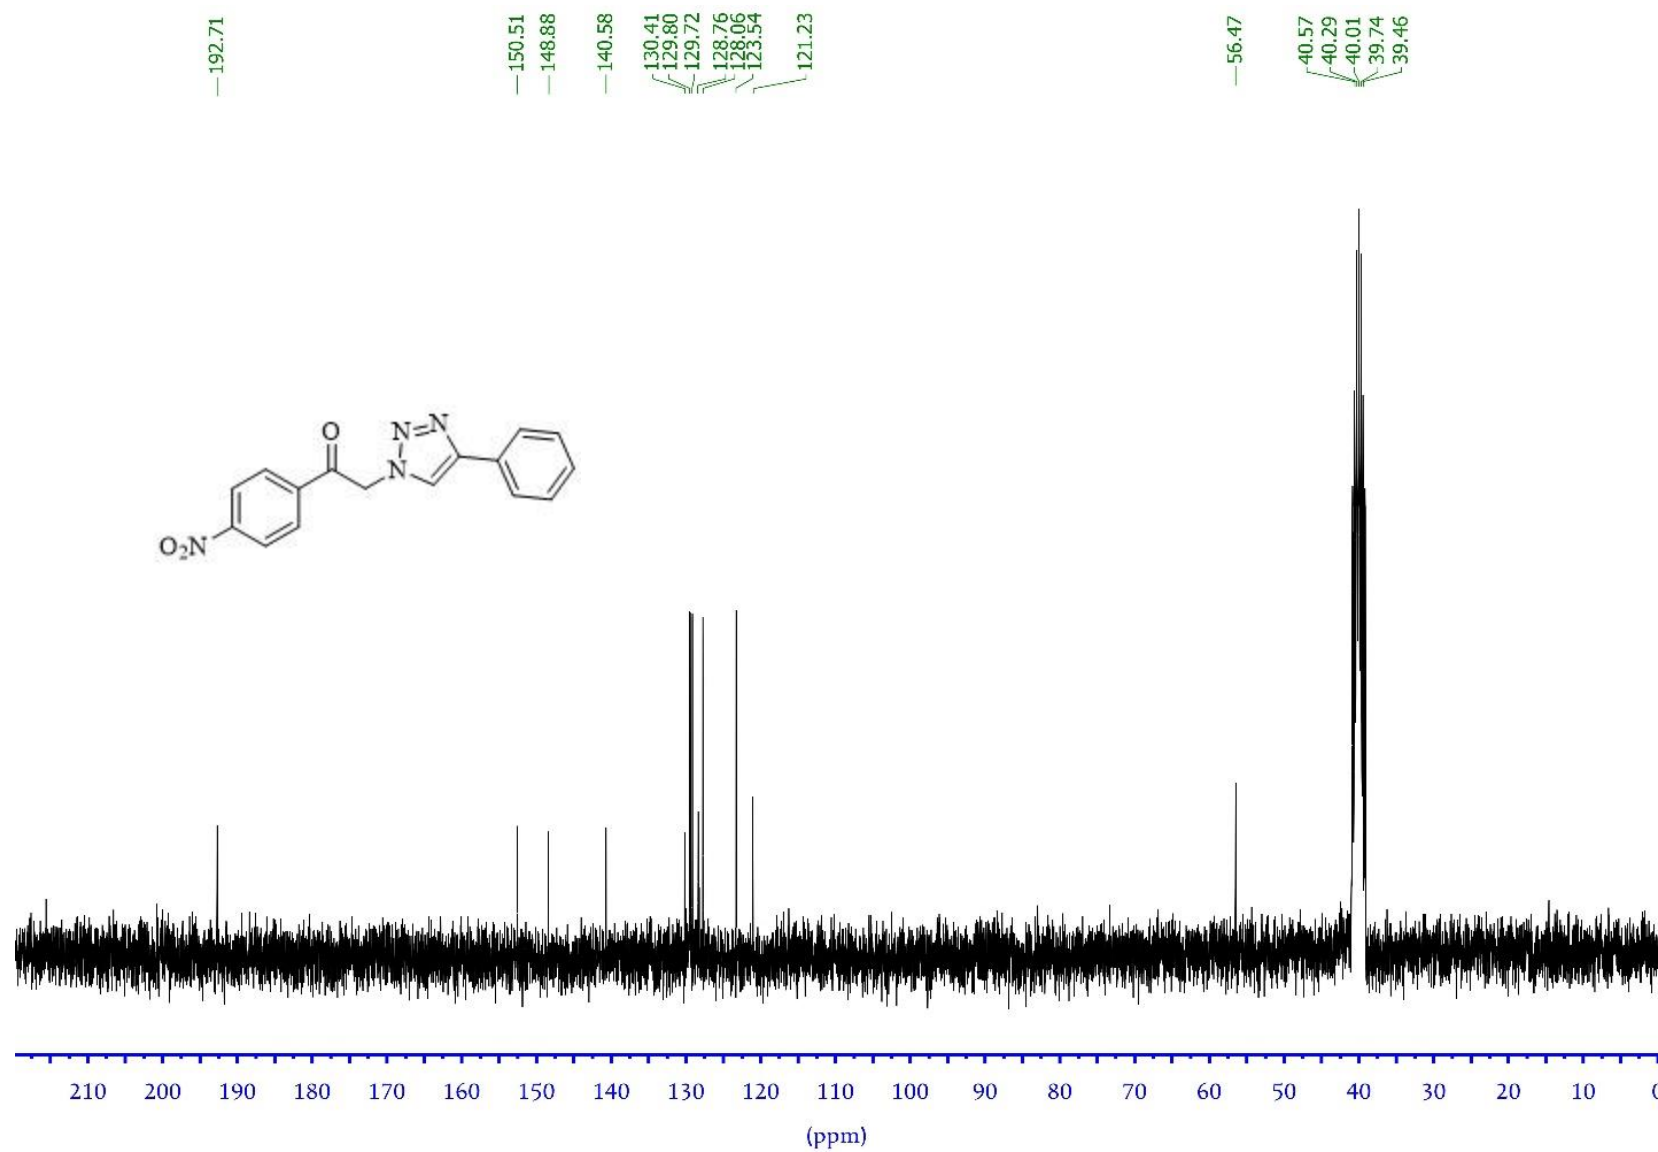

Figure S20: <sup>13</sup>C-NMR of 1-(4-Nitro phenyl)-2-(4-phenyl-1H-1,2,3-triazol-1-yl)ethanone

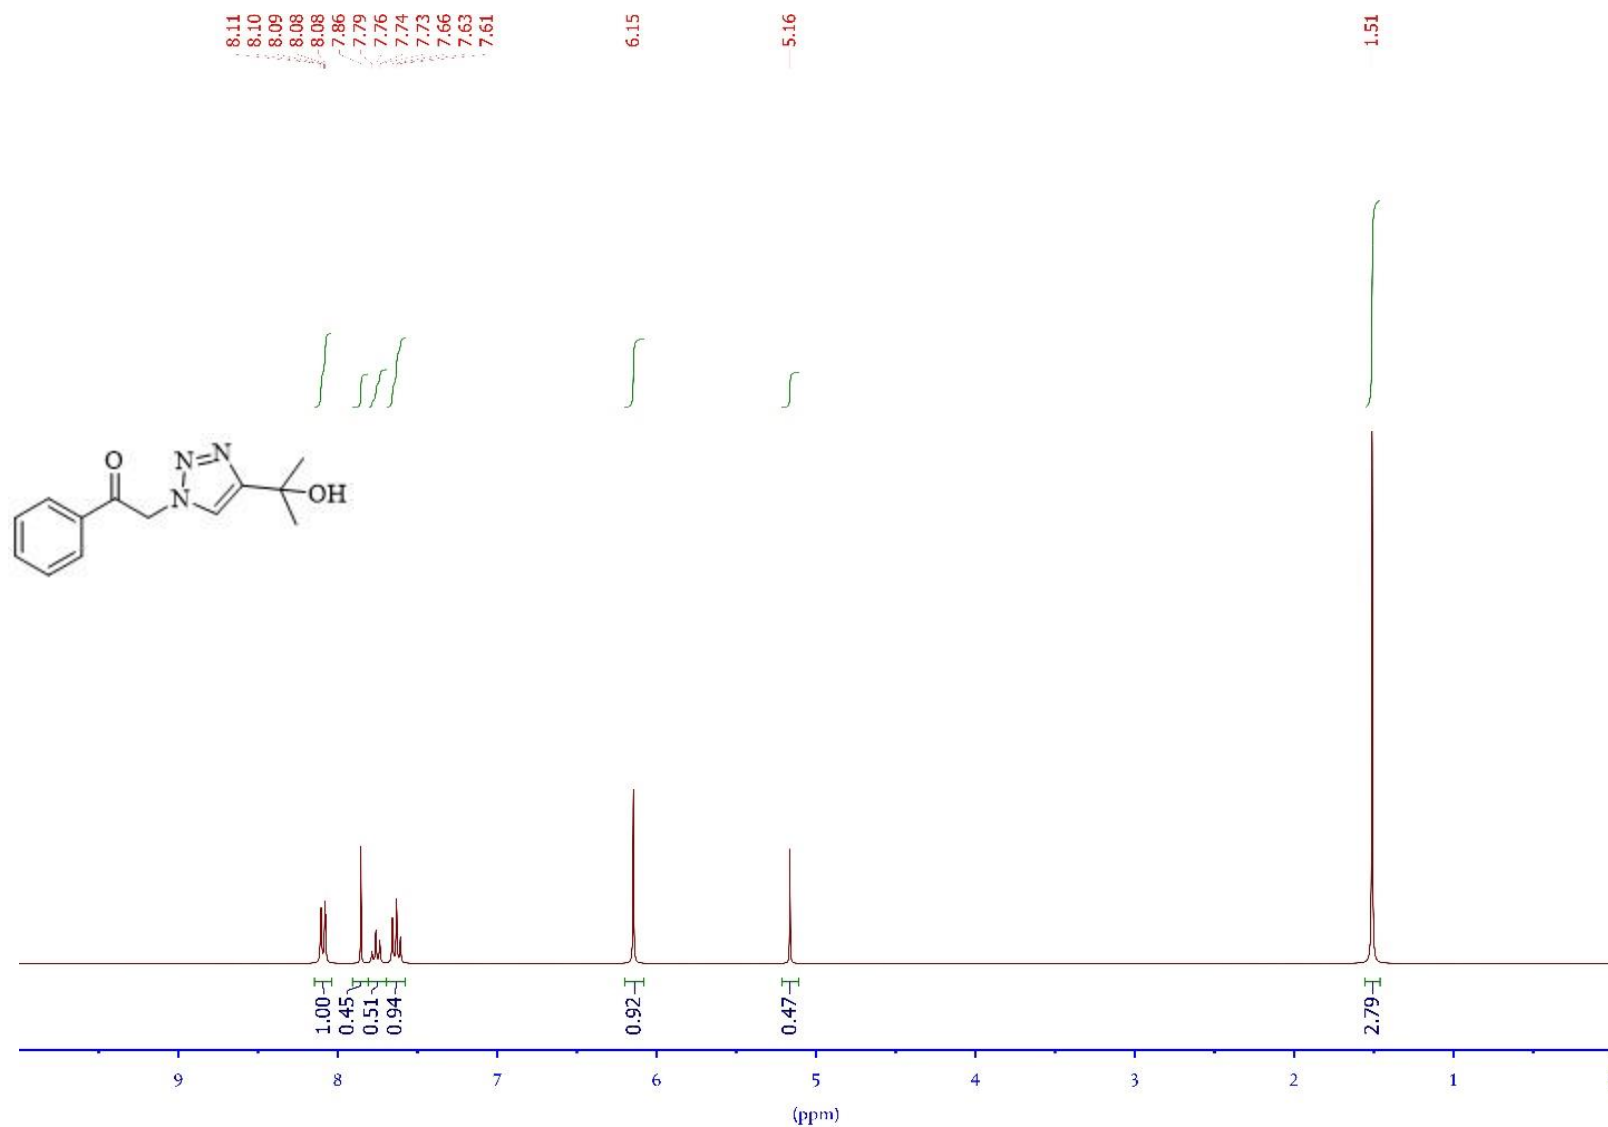

Figure S21: <sup>1</sup>H-NMR of 2-(4-(2-Hydroxypropan-2-yl)-1H-1,2,3-triazol-1-yl)-1-phenylethanone

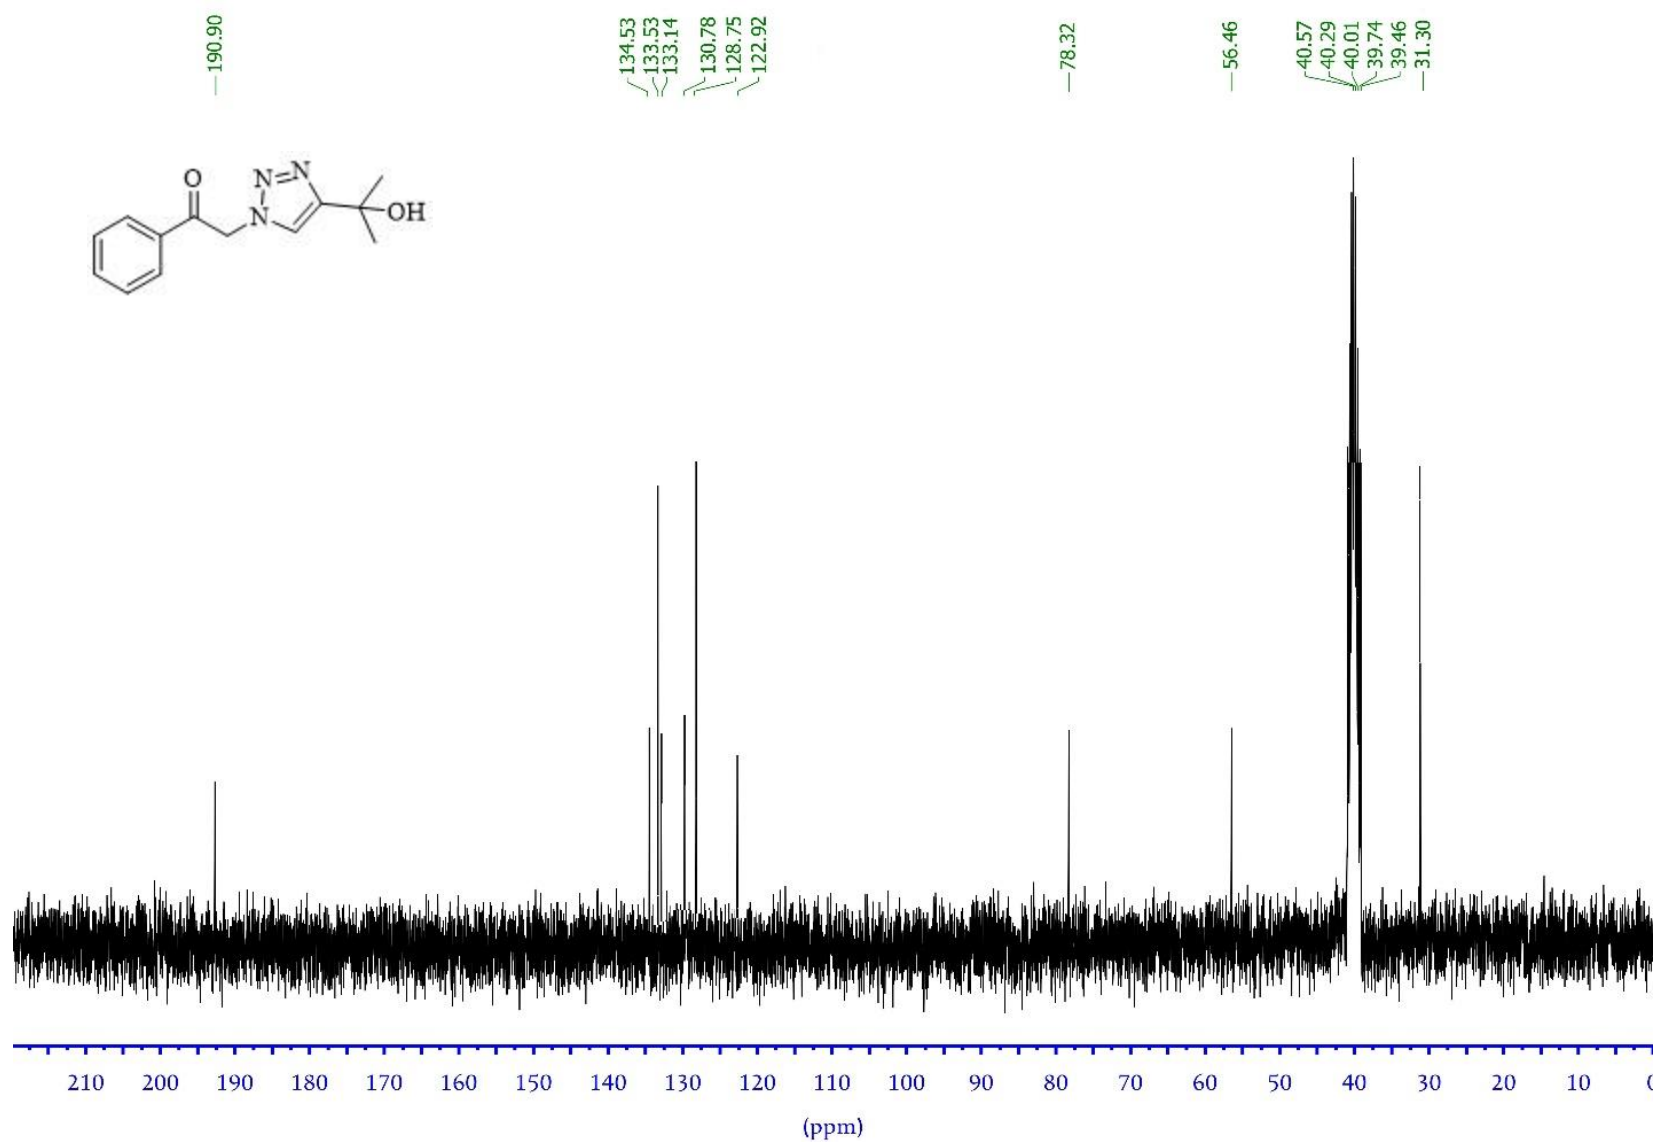

Figure S22: <sup>13</sup>C-NMR of 2-(4-(2-Hydroxypropan-2-yl)-1H-1,2,3-triazol-1-yl)-1-phenylethanone

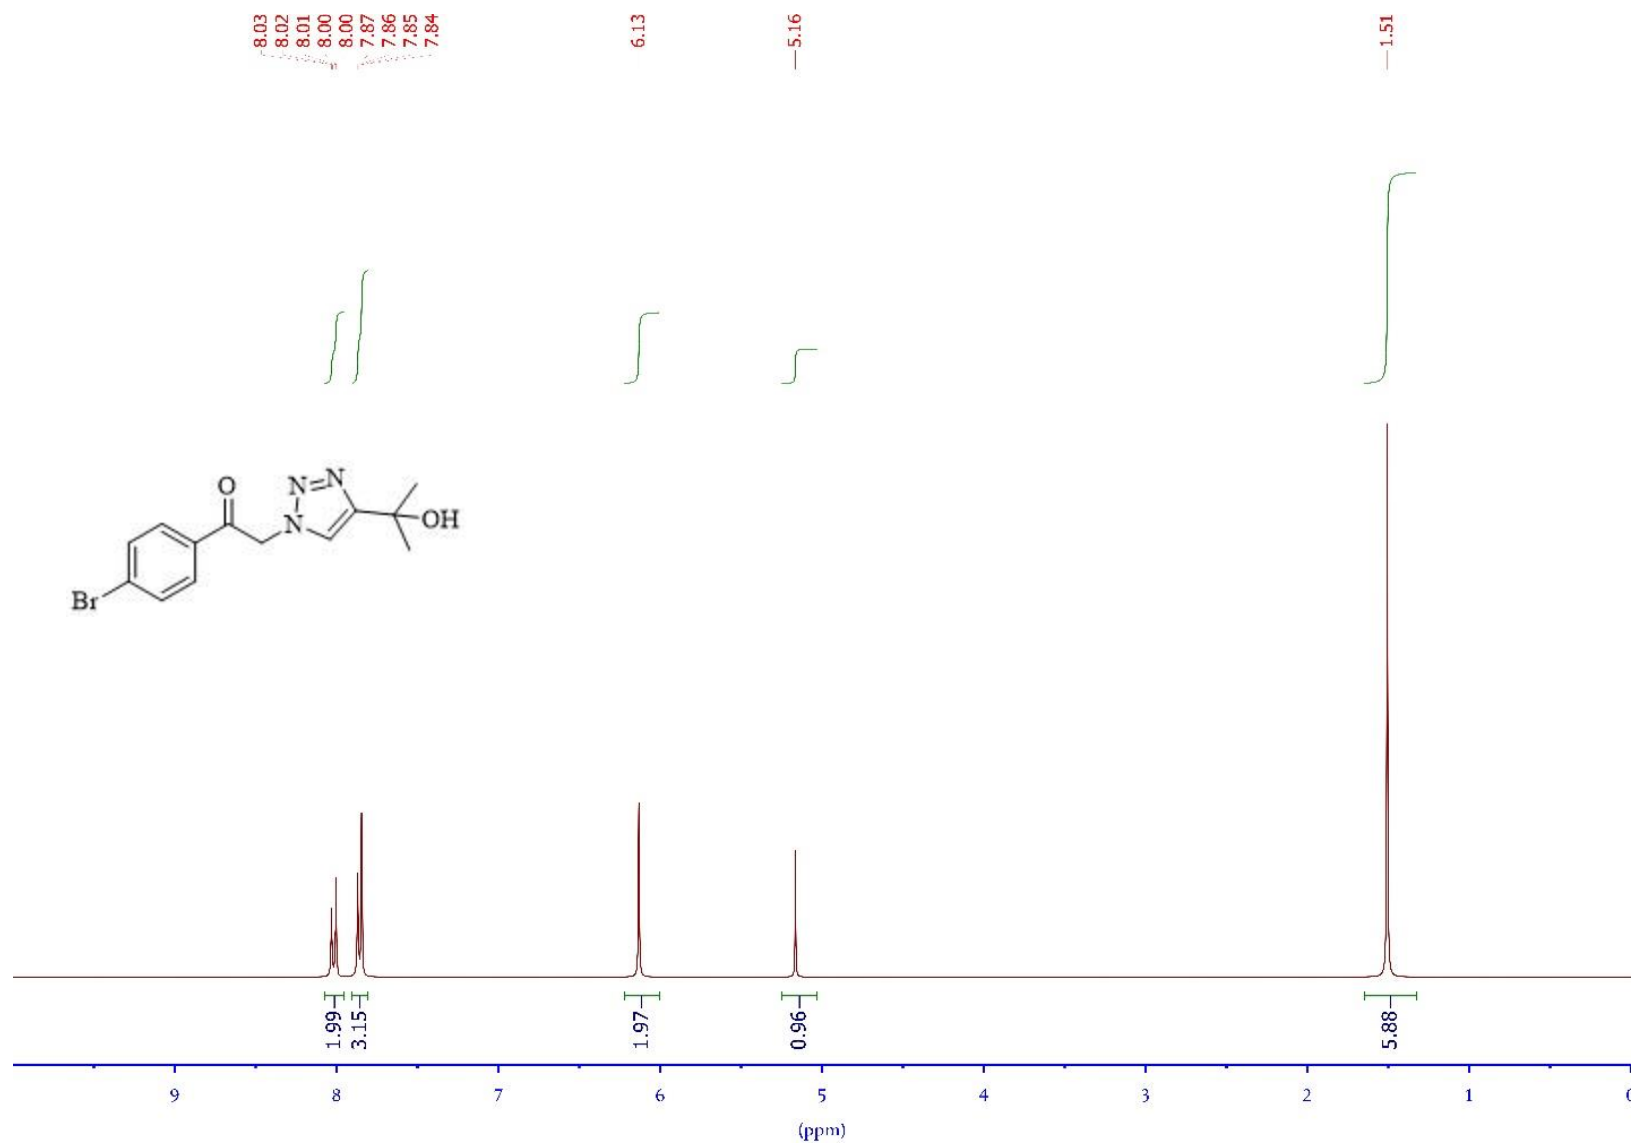

Figure S23: <sup>1</sup>H-NMR of 1-(4-Bromophenyl)-2-(4-(2-hydroxypropan-2-yl)-1H-1,2,3-triazol-1-yl)ethanone

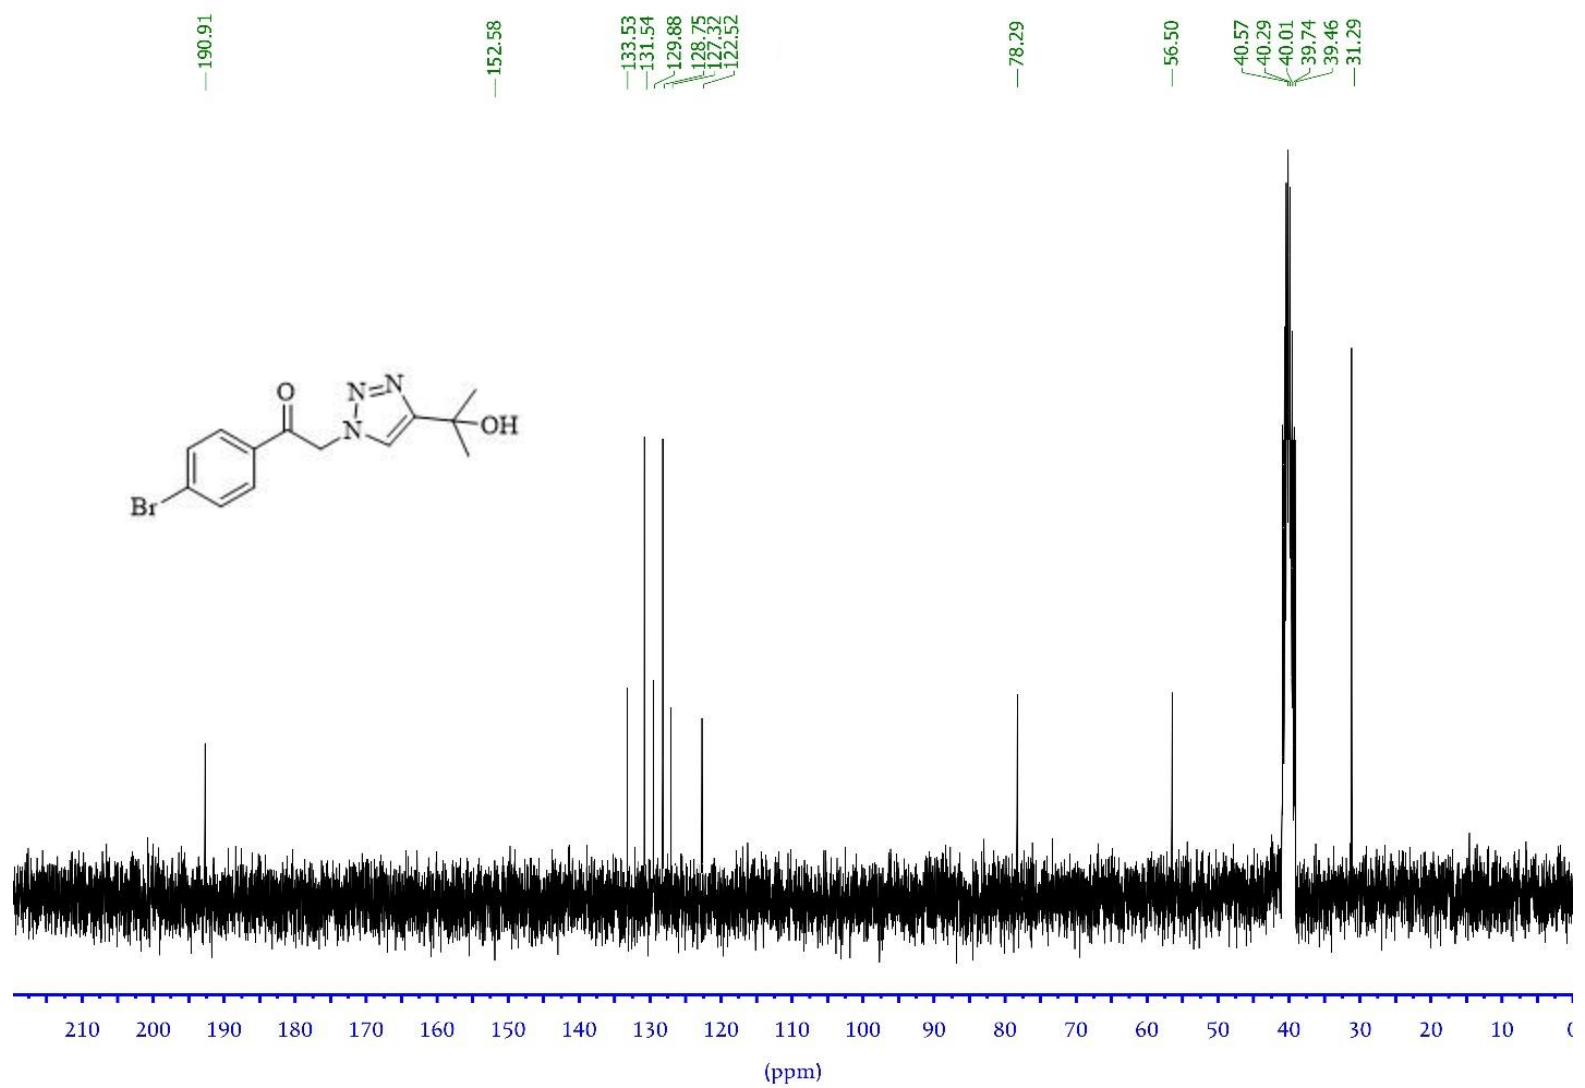

Figure S24: <sup>13</sup>C-NMR of 1-(4-Bromophenyl)-2-(4-(2-hydroxypropan-2-yl)-1H-1,2,3-triazol-1-yl)ethanone

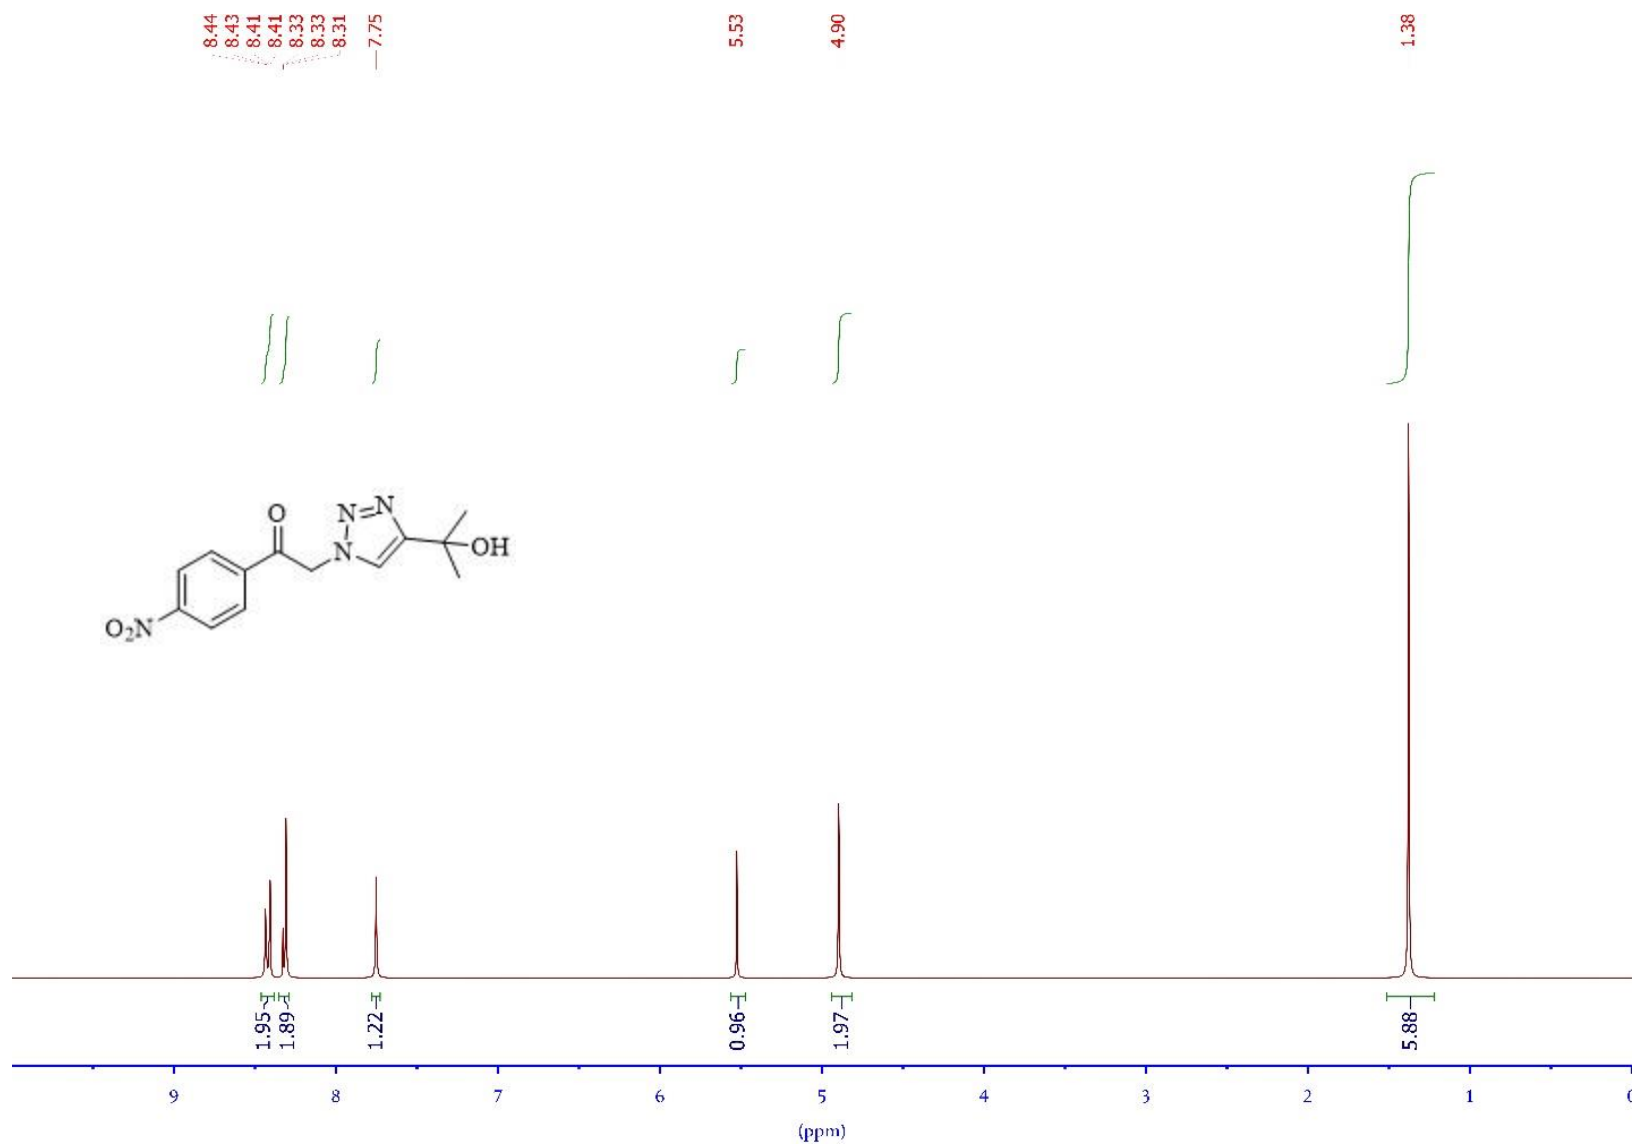

Figure S25: <sup>1</sup>H-NMR of 2-(4-(2-Hydroxypropan-2-yl)-1H-1,2,3-triazol-1-yl)-1-(4-nitrophenyl)ethanone

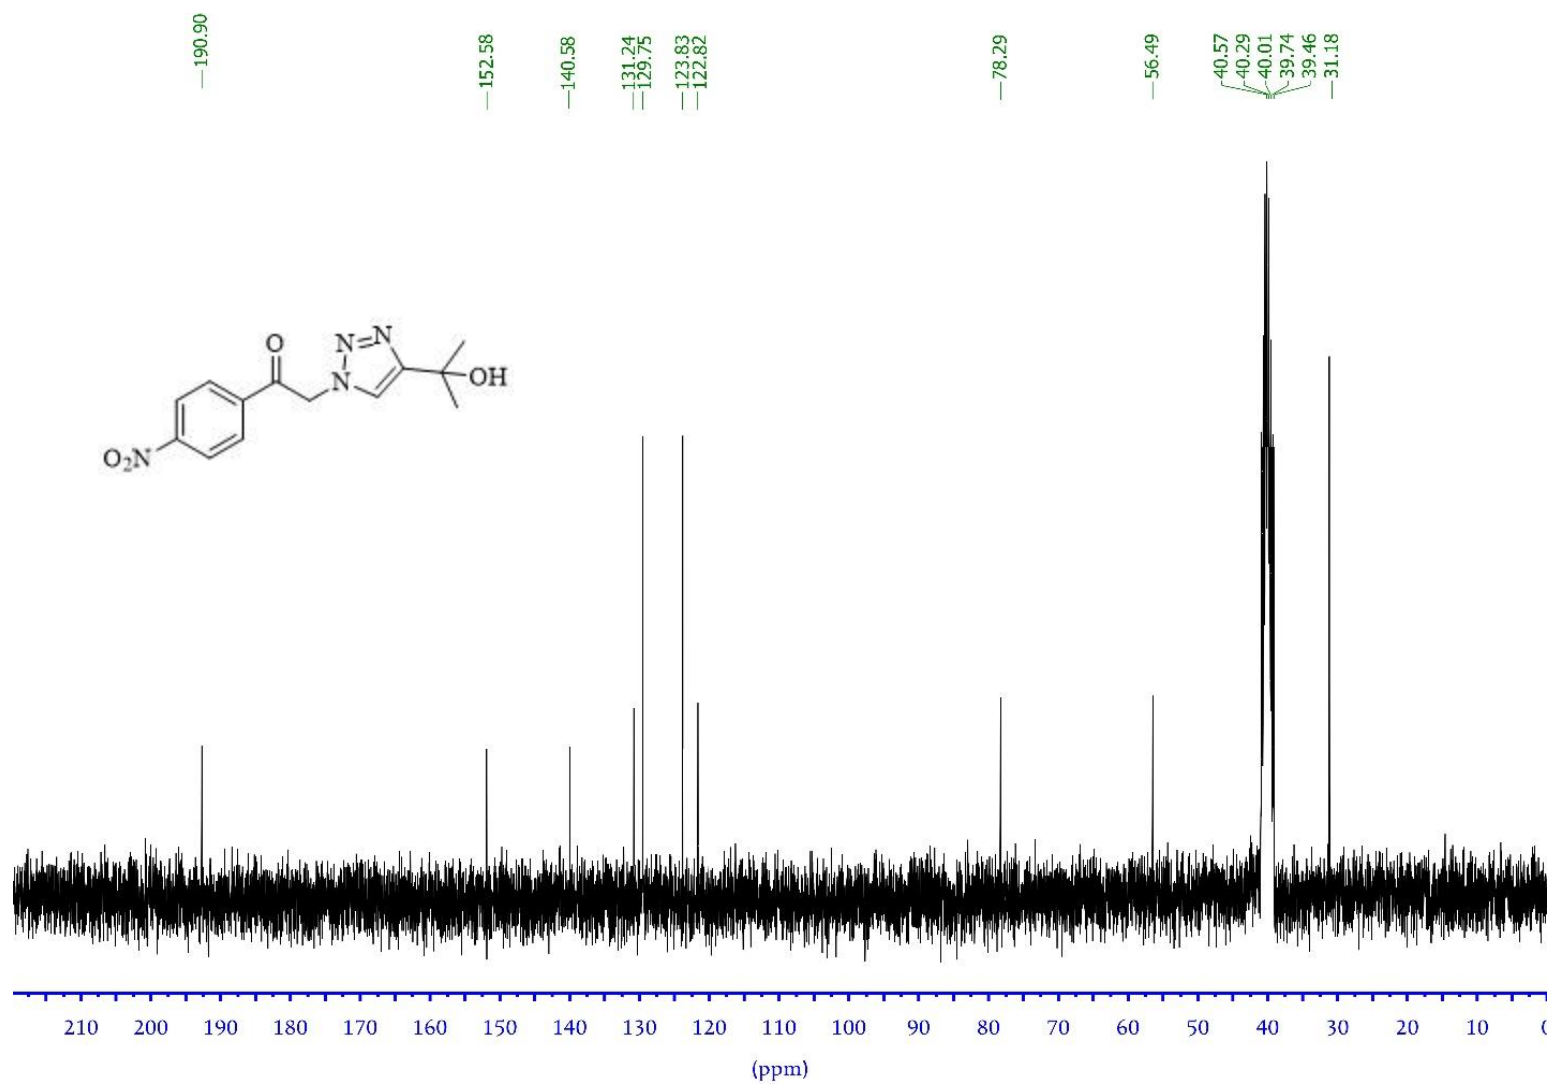

Figure S26: <sup>13</sup>C-NMR of 2-(4-(2-Hydroxypropan-2-yl)-1H-1,2,3-triazol-1-yl)-1-(4-nitrophenyl)ethanone

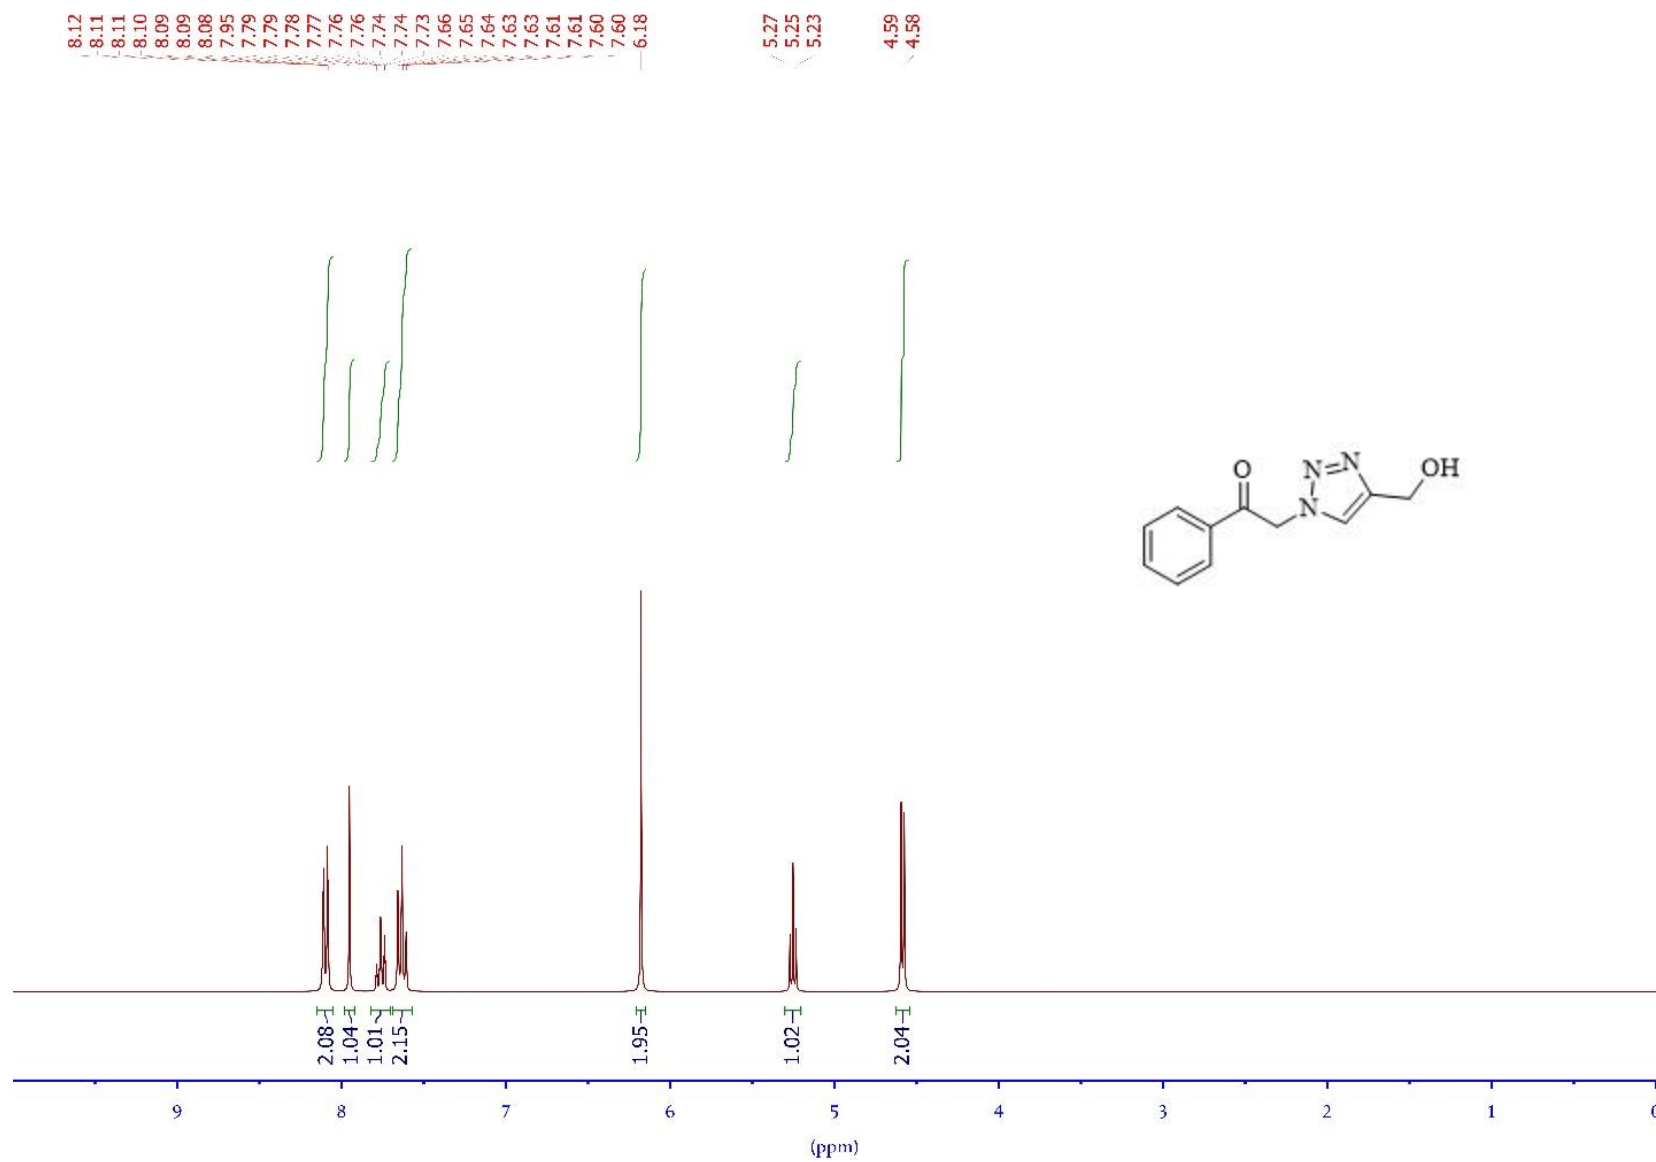

Figure S27: <sup>1</sup>H-NMR of 2-(4-(Hydroxymethyl)-1H-1,2,3-triazol-1-yl)-1-phenylethanone



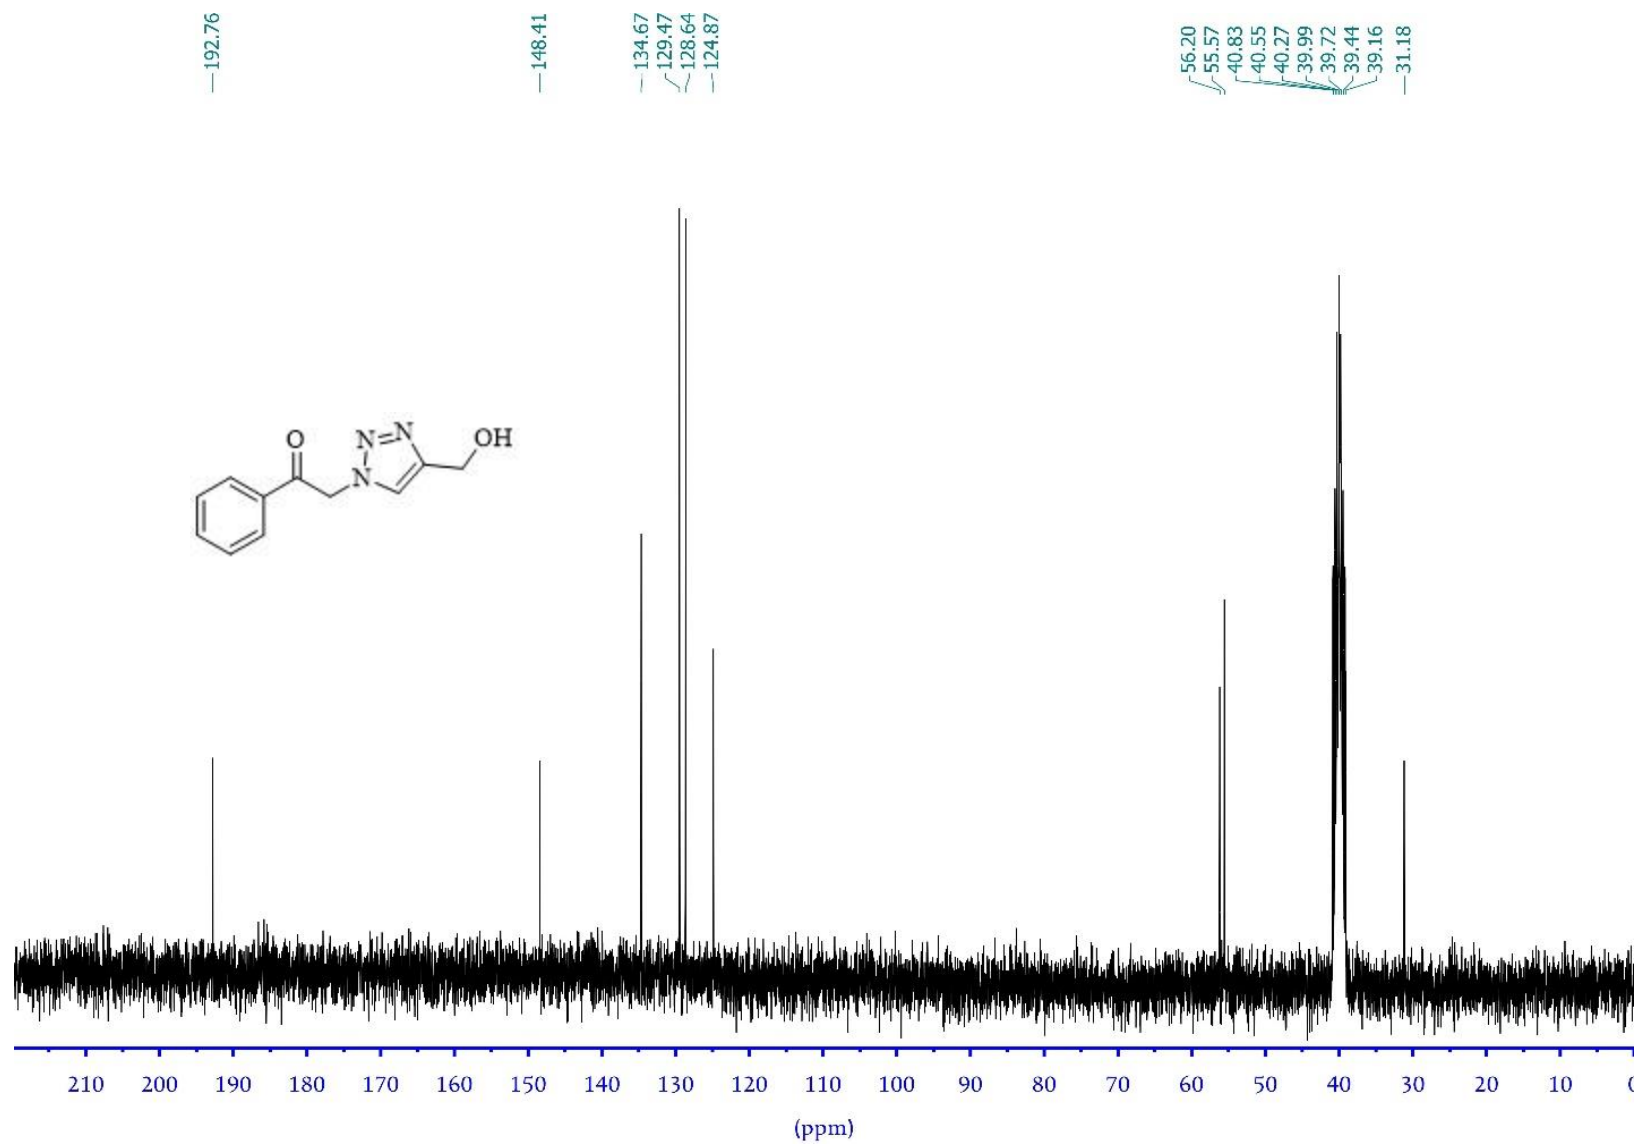

Figure S28:  $^{13}\text{C}$ -NMR of 2-(4-(Hydroxymethyl)-1H-1,2,3-triazol-1-yl)-1-phenylethanone

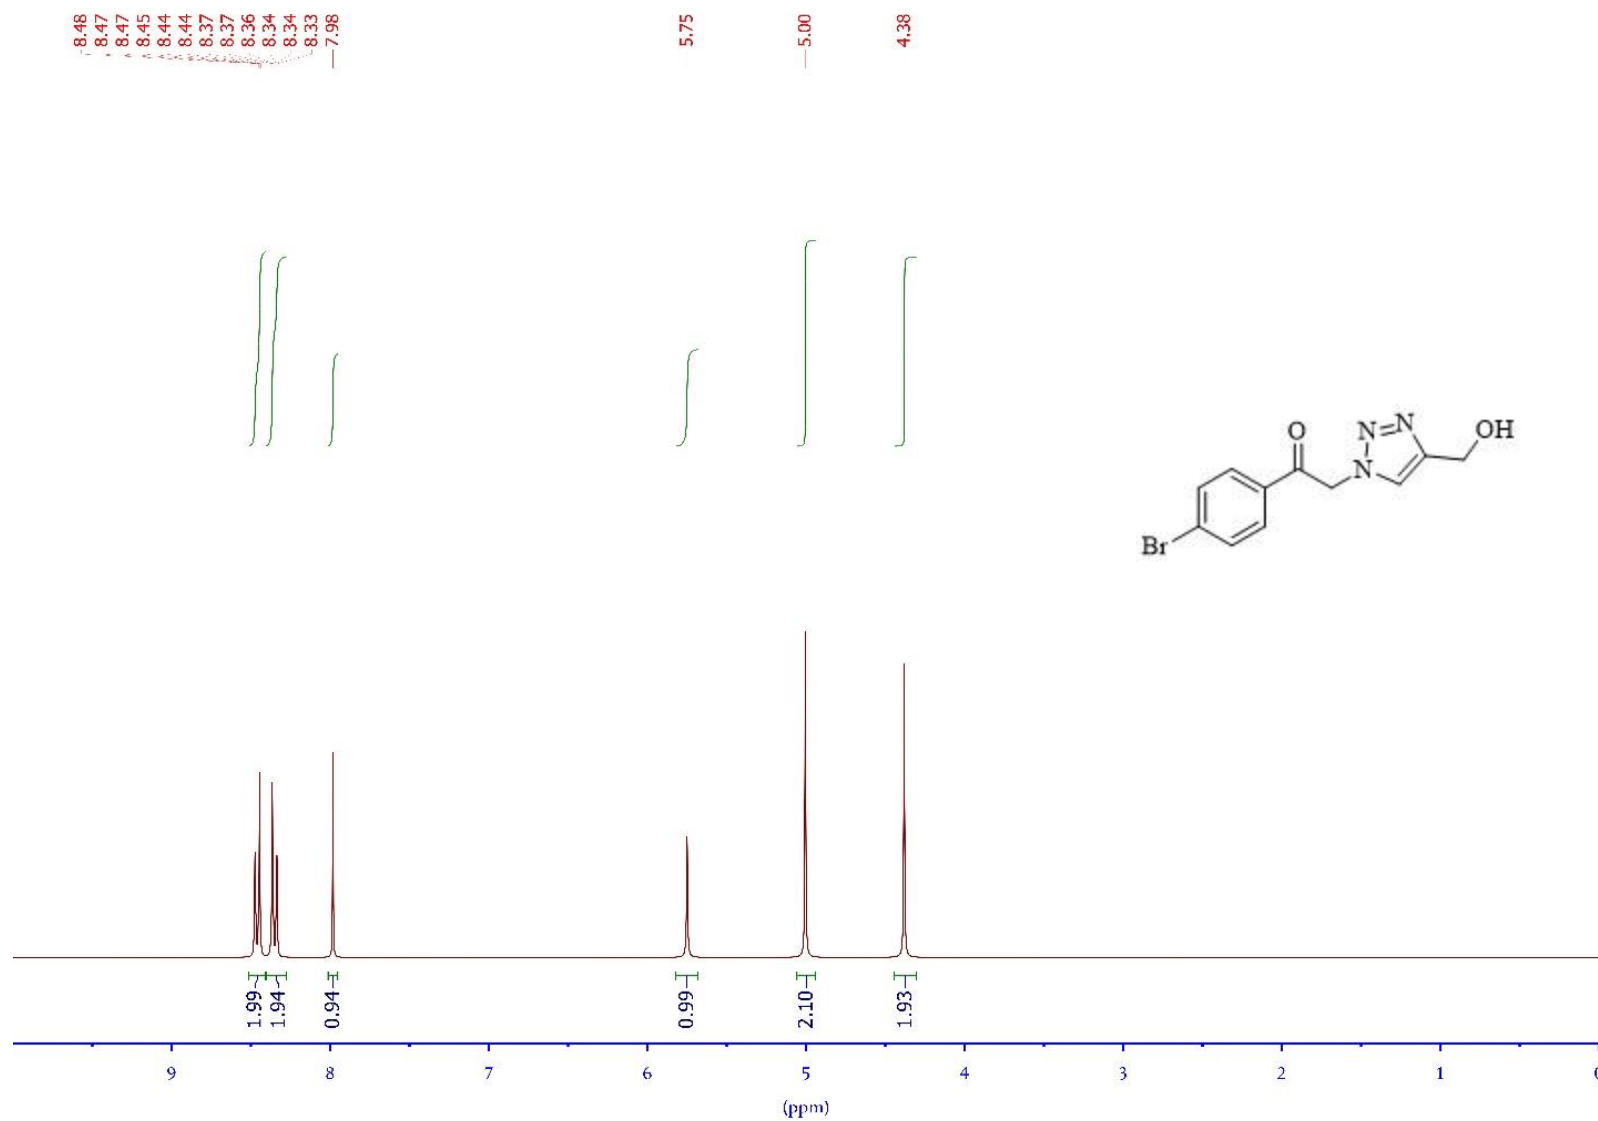

Figure S29: <sup>1</sup>H-NMR of 1-(4-Bromophenyl)-2-(4-(hydroxymethyl)-1H-1,2,3-triazol-1-yl)ethanone

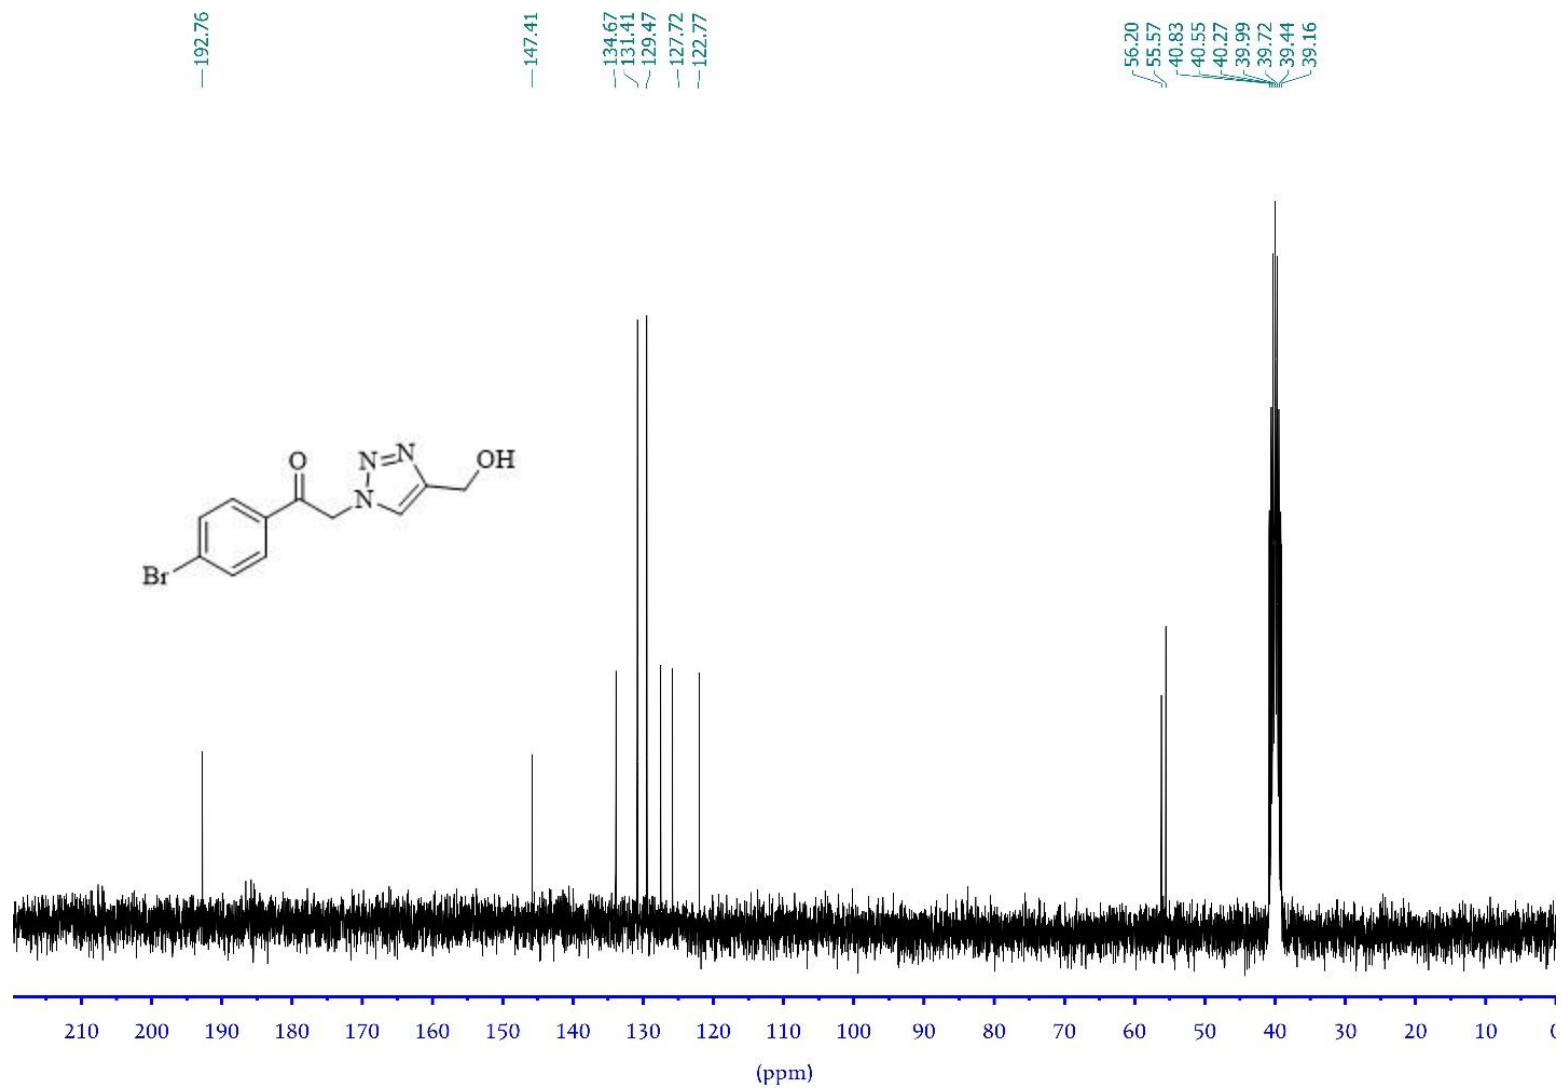

Figure S30: <sup>13</sup>C-NMR of 1-(4-Bromophenyl)-2-(4-(hydroxymethyl)-1H-1,2,3-triazol-1-yl)ethanone
